# Supplementary material
Source: publisher site journal article supplement (https://www.spandidos-publications.com/4235/downloadSupplementary)
Supplement: Supplementary file 1 [file downloadSupplementary]

## Sheet: GO
Table SII. All the GO functional term from the DAVID 6.8 database.
Category	Term	Count	%	P-value	Genes	List Total	Pop Hits	Pop Total	Fold Enrichment	Bonferroni	Benjamini	False discovery rate
Up-regulagted genes
Biological process	GO:0006955~immune response	60	21.0526	2.77976e-38	CD86, CXCL6, ADAMDEC1, CXCL9, GPR65, LST1, AQP9, LY75, CXCL1, CTSW, CXCL13, CXCL5, CTSS, JCHAIN, TRBC1, TNFSF10, TNFSF11, CCR7, CCR5, HLA-DOB, TNFRSF4, CTSC, CCR2, CD96, CR2, IL15, ZAP70, AIM2, CD8A, IGHD, LTB, HLA-DQB1, CCL13, CFP, CST7, IL2RG, CRIP1, CD79B, HLA-DMA, IGLV1-40, HLA-DMB, IGKC, CCL5, CCL19, CCL18, HLA-DQA1, IL32, SEMA4D, GZMA, LILRB2, GZMH, CXCL10, CXCL11, CD40LG, IL7, CD7, HLA-DPB…	275	421	16792	8.7024	4.58105e-35	4.57827e-35	4.38091e-35
Biological process	GO:0006954~inflammatory response	40	14.0351	2.23441e-20	CCL13, CXCL6, CXCL9, ITGB2, LY75, CXCR4, CXCL1, CXCR6, AOAH, CXCL13, ITGAL, AIF1, CXCL5, ADGRE2, CCL5, CXCR3, SCN9A, BLNK, SPP1, CCR7, CCL19, CD14, CCR5, CCL18, TNFRSF4, CCR2, SYK, IL15, CYBB, CYBA, NMI, CXCL10, ZAP70, CXCL11, AIM2, CD40LG, CD27, SDC1, ADAM8, S100A9	275	379	16792	6.44452	3.68231e-17	1.84004e-17	1.76071e-17
Biological process	GO:0050776~regulation of immune response	25	8.77193	1.56669e-15	KLRB1, TRAC, ITGB2, ICAM3, CD3G, CD3E, ITGAL, CD3D, KLRK1, IGLV1-40, IGKC, CD19, TRBC1, ITGB7, CD96, ITGA4, SH2D1A, CRTAM, LILRB2, COL1A1, CD40LG, SELL, CD8A, CD247, FCGR2B	275	178	16792	8.5761	2.56151e-12	8.60112e-13	8.23034e-13
Biological process	GO:0002250~adaptive immune response	23	8.07018	3.09399e-15	CD86, IGHM, ITK, SYK, PRKCB, CLEC10A, SH2D1A, CRTAM, TAP1, LILRB2, LILRB3, LILRB4, CTSS, JCHAIN, CD79B, CD79A, ZAP70, KLRK1, SIT1, LAMP3, CD7, TNFRSF17, JAK2	275	148	16792	9.48934	5.12301e-12	1.27395e-12	1.21903e-12
Biological process	GO:0070098~chemokine-mediated signaling pathway	17	5.96491	2.34104e-14	CX3CR1, CXCL6, CCL13, CXCL9, CXCR4, CXCL1, CXCR6, CXCL13, CXCL5, CXCL10, CXCL11, CCL5, CXCR3, CCL19, CCR5, CCL18, CCR2	275	71	16792	14.6204	3.86056e-11	7.71137e-12	7.37895e-12
Biological process	GO:0050853~B cell receptor signaling pathway	15	5.26316	1.23359e-13	IGHM, SYK, PRKCB, CD79B, CD79A, ZAP70, IGHG1, PTPRC, IGKC, LCK, CD19, IGHD, PLCG2, CD38, NCKAP1L	275	54	16792	16.9616	2.03274e-10	3.3862e-11	3.24023e-11
Biological process	GO:0006935~chemotaxis	19	6.66667	1.26152e-12	CX3CR1, CXCL6, CCL13, CXCL9, CXCR4, CXCL1, CXCR6, CXCL5, CXCL10, CXCL11, CCL5, CXCR3, RAC2, CCR7, NCKAP1L, DOCK2, CCR5, CCL18, CCR2	275	122	16792	9.50963	2.07903e-09	2.96818e-10	2.84023e-10
Biological process	GO:0031295~T cell costimulation	15	5.26316	2.7426e-11	CD86, TRAC, CD3G, CD3E, CD3D, KLRK1, CD40LG, LCK, TRBC1, HLA-DPB1, CD247, CCL19, CD24, HLA-DQA1, HLA-DQB1	275	78	16792	11.7427	4.51981e-08	5.64634e-09	5.40293e-09
Biological process	GO:0050852~T cell receptor signaling pathway	18	6.31579	3.14391e-10	ITK, TRAC, CD3G, THY1, CD3E, CD3D, PSMB8, PSMB10, PSMB9, ZAP70, PTPRC, LCK, TRBC1, HLA-DPB1, PLCG2, CD247, HLA-DQA1, HLA-DQB1	275	148	16792	7.42644	5.18116e-07	5.75335e-08	5.50533e-08
Biological process	GO:0007166~cell surface receptor signaling pathway	23	8.07018	8.35609e-10	LAG3, KLRB1, CD3G, LILRB2, CXCL13, LILRB3, CD3E, CD3D, CD2, ADGRE2, CXCL10, PTPRC, CD8A, CD19, CXCR3, TNFSF10, CD27, CD37, CD14, CD247, CCR5, IL7R, BIRC3	275	274	16792	5.12563	1.37708e-06	1.37625e-07	1.31692e-07
Biological process	GO:0032496~response to lipopolysaccharide	18	6.31579	1.57013e-09	CXCL6, CD96, CXCL9, IL10RA, FMO1, CXCL1, CSF2RB, CXCL13, CXCL5, LOXL1, CXCL10, CXCL11, PLCG2, CD27, CCR7, JAK2, TNFRSF4, IDO1	275	164	16792	6.70191	2.58757e-06	2.35092e-07	2.24957e-07
Biological process	GO:0007155~cell adhesion	29	10.1754	2.15267e-09	CX3CR1, SELPLG, ITGB2, ICAM3, THY1, ITGAL, NID2, LOXL2, ADGRE2, CXCR3, ITGAX, SPP1, LPXN, ITGB7, PLXNC1, SLAMF1, IL32, CD96, ENTPD1, CD72, SEMA4D, ITGA4, CD2, COL1A1, SELL, FAP, CDH11, CDH13, CD24	275	459	16792	3.85794	3.54759e-06	2.95454e-07	2.82717e-07
Biological process	GO:0042102~positive regulation of T cell proliferation	12	4.21053	3.0171e-09	HLA-DMB, PTPRC, CD40LG, IL15, CCL5, HLA-DPB1, NCKAP1L, LILRB2, CCL19, CD3E, AIF1, CORO1A	275	60	16792	12.2124	4.97217e-06	3.82243e-07	3.65765e-07
Biological process	GO:0045087~innate immune response	27	9.47368	9.9517e-09	IGHM, ITK, CLEC10A, CORO1A, LY9, JCHAIN, IGHG1, KLRK1, IGKC, CD14, JAK2, APOL1, SLAMF1, CR2, APOBEC3F, SYK, APOBEC3G, SH2D1A, MATK, CYBB, CYBA, ZAP70, AIM2, LCK, IGHD, S100A9, APOBEC3B	275	430	16792	3.83411	1.64003e-05	1.17075e-06	1.12028e-06
Biological process	GO:0007165~signal transduction	47	16.4912	1.71695e-08	CCL13, CXCL6, ITK, CXCL9, TENM4, LY75, CSF2RB, CXCL1, ITGAL, IL2RG, RASGRP1, CXCL5, ARHGAP4, NRGN, CD79B, KLRK1, FGF9, SIT1, SPOCK2, CHN1, TNFSF10, RAC2, TNFRSF17, CD38, LPXN, JAK2, CCL18, HLA-DOB, SLAMF1, CD72, PRKCB, IL15, LILRB2, ARHGAP25, LILRB4, ARHGAP45, CXCL10, P2RX5, CXCL11, PNOC, VOPP1, CD48, LTB, ROR2, FCGR2B, IL7R, S100A9	275	1161	16792	2.47193	2.8295e-05	1.88521e-06	1.80394e-06
Biological process	GO:0007267~cell-cell signaling	20	7.01754	3.86296e-08	CD86, CXCL6, CCL13, CXCL9, IL15, SH2D1A, ITGB2, LILRB2, CXCL13, CXCL5, CXCL10, CXCL11, FGF9, IL7, CCL5, TNFSF10, LTB, CCR5, CCL18, S100A9	275	254	16792	4.80802	6.36595e-05	3.97643e-06	3.80501e-06
Biological process	GO:0042110~T cell activation	10	3.50877	5.69776e-08	CD2, CD86, ITK, ZAP70, CD8A, IRF4, CD7, CD48, CD3G, CD3E	275	47	16792	12.9919	9.38947e-05	5.29278e-06	5.06462e-06
Biological process	GO:0006968~cellular defense response	11	3.85965	5.78446e-08	CX3CR1, ITK, CXCL9, FCMR, GNLY, CD19, SH2D1A, PRF1, LILRB2, CCR5, CCR2	275	62	16792	10.8335	9.53234e-05	5.29278e-06	5.06462e-06
Biological process	GO:0033209~tumor necrosis factor-mediated signaling pathway	13	4.5614	5.14574e-07	STAT1, PSMB8, PSMB10, PSMB9, AIM2, CD40LG, TNFRSF17, CD27, TNFSF11, LTB, JAK2, TNFRSF4, BIRC3	275	118	16792	6.72715	0.000847659	4.46055e-05	4.26826e-05
Biological process	GO:0051607~defense response to virus	14	4.91228	3.1972e-06	CD86, CXCL9, APOBEC3F, APOBEC3G, STAT1, PRF1, IFIT1, ISG20, CXCL10, PTPRC, CD8A, ITGAX, GBP1, APOBEC3B	275	165	16792	5.181	0.00525514	0.000263289	0.000251939
Biological process	GO:0007169~transmembrane receptor protein tyrosine kinase signaling pathway	11	3.85965	3.72831e-06	ITK, ZAP70, SYK, LCK, CD8A, CD7, BLNK, MATK, ROR2, CD3E, GFRA2	275	96	16792	6.99667	0.00612542	0.000292406	0.0002798
Biological process	GO:0051281~positive regulation of release of sequestered calcium ion into cytosol	7	2.45614	3.96537e-06	CXCL10, CXCL11, CXCL9, CEMIP, CXCR3, CD19, THY1	275	27	16792	15.8308	0.00651363	0.000296862	0.000284064
Biological process	GO:0050900~leukocyte migration	12	4.21053	5.05763e-06	CD2, COL1A1, SELPLG, SELL, ITGA4, MMP1, LCK, ITGB2, ITGAX, CD48, ITGAL, MMP9	275	122	16792	6.00608	0.00830035	0.00036217	0.000346558
Biological process	GO:0002504~antigen processing and presentation of peptide or polysaccharide antigen via MHC class II	6	2.10526	5.87736e-06	HLA-DMA, HLA-DMB, HLA-DPB1, HLA-DOB, HLA-DQA1, HLA-DQB1	275	17	16792	21.5512	0.00963916	0.0003872	0.000370509
Biological process	GO:0002407~dendritic cell chemotaxis	6	2.10526	5.87736e-06	CCL5, CXCR4, CCR7, CCL19, CCR5, CCR2	275	17	16792	21.5512	0.00963916	0.0003872	0.000370509
Biological process	GO:0030217~T cell differentiation	7	2.45614	7.63385e-06	ZAP70, PTPRC, LCK, RHOH, IL7R, CD3D, GPR18	275	30	16792	14.2478	0.0125018	0.000483575	0.000462729
Biological process	GO:0060326~cell chemotaxis	9	3.15789	1.02399e-05	CXCL6, CCL13, CXCL10, CXCL9, CCL5, LEF1, CXCL1, CCL19, CXCL5	275	65	16792	8.45471	0.0167339	0.000624634	0.000597707
Biological process	GO:0042100~B cell proliferation	7	2.45614	1.13356e-05	CD79A, CR2, PTPRC, CD40LG, LEF1, IL7R, MS4A1	275	32	16792	13.3573	0.0185078	0.000666779	0.000638035
Biological process	GO:0051603~proteolysis involved in cellular protein catabolic process	8	2.80702	1.1855e-05	FAP, GZMA, CTSW, PSMB8, CTSS, CTSC, PSMB10, PSMB9	275	48	16792	10.177	0.0193475	0.000673281	0.000644257
Biological process	GO:0006952~defense response	9	3.15789	1.2865e-05	IL32, HCP5, CXCL9, SP140, TAP1, CD48, PTPRCAP, LILRB3, KCNN4	275	67	16792	8.20233	0.0209785	0.000706289	0.000675842
Biological process	GO:0050850~positive regulation of calcium-mediated signaling	6	2.10526	1.41462e-05	ZAP70, P2RX5, SYK, CD8A, CDH13, CD3E	275	20	16792	18.3185	0.0230434	0.000751572	0.000719173
Biological process	GO:0034113~heterotypic cell-cell adhesion	6	2.10526	2.33936e-05	CD2, ITGA4, ITGB2, ITGAX, ITGB7, LILRB2	275	22	16792	16.6532	0.0378194	0.00120404	0.00115214
Biological process	GO:0050729~positive regulation of inflammatory response	9	3.15789	2.43682e-05	CCL13, IL15, CCL5, WNT5A, JAK2, CCL18, PLA2G7, S100A9, CCR2	275	73	16792	7.52817	0.0393636	0.00121619	0.00116377
Biological process	GO:0045780~positive regulation of bone resorption	5	1.75439	4.41558e-05	SYK, CA2, SPP1, TNFSF11, ADAM8	275	13	16792	23.4853	0.0701857	0.00213374	0.00204175
Biological process	GO:0007159~leukocyte cell-cell adhesion	6	2.10526	4.53435e-05	CD40LG, SYK, ITGA4, CCL5, ITGB2, ITGAL	275	25	16792	14.6548	0.0720039	0.00213374	0.00204175
Biological process	GO:0030816~positive regulation of cAMP metabolic process	4	1.40351	8.28754e-05	CXCL10, CXCL11, CXCL9, CXCR3	275	6	16792	40.7079	0.127667	0.00379155	0.0036281
Biological process	GO:0030183~B cell differentiation	8	2.80702	9.76606e-05	TPD52, CD79B, CD79A, CR2, CD40LG, ITGA4, BLNK, PLCG2	275	66	16792	7.40143	0.148668	0.00434722	0.00415982
Biological process	GO:0090026~positive regulation of monocyte chemotaxis	5	1.75439	0.000108135	CXCL10, CCL5, PLA2G7, AIF1, CCR2	275	16	16792	19.0818	0.163238	0.0046868	0.00448476
Biological process	GO:0060333~interferon-gamma-mediated signaling pathway	8	2.80702	0.000155609	STAT1, IRF4, HLA-DPB1, NMI, JAK2, GBP1, HLA-DQA1, HLA-DQB1	275	71	16792	6.8802	0.226217	0.00657149	0.0062882
Biological process	GO:0002690~positive regulation of leukocyte chemotaxis	5	1.75439	0.00017719	CXCL6, CXCL10, CXCL11, CXCL9, CXCL5	275	18	16792	16.9616	0.253258	0.00694838	0.00664885
Biological process	GO:0050870~positive regulation of T cell activation	5	1.75439	0.00017719	LCK, HLA-DPB1, TNFSF11, THY1, CCR2	275	18	16792	16.9616	0.253258	0.00694838	0.00664885
Biological process	GO:0045954~positive regulation of natural killer cell mediated cytotoxicity	5	1.75439	0.00017719	LAG3, KLRK1, SH2D1A, CRTAM, RASGRP1	275	18	16792	16.9616	0.253258	0.00694838	0.00664885
Biological process	GO:0007229~integrin-mediated signaling pathway	9	3.15789	0.000215505	ADAMDEC1, SYK, ITGA4, ITGB2, PLEK, ITGAX, ADAM8, ITGB7, ITGAL	275	99	16792	5.55107	0.29896	0.00825434	0.00789851
Biological process	GO:0042127~regulation of cell proliferation	12	4.21053	0.000234291	CXCL6, ITK, CXCL10, CXCL11, CXCL9, LCK, CD27, FOXM1, CXCL13, JAK2, TNFRSF4, EZH2	275	185	16792	3.96077	0.320336	0.00873654	0.00835992
Biological process	GO:0022617~extracellular matrix disassembly	8	2.80702	0.000238703	MMP1, MMP3, SPP1, ADAM8, CAPG, LCP1, MMP9, CTSS	275	76	16792	6.42756	0.325261	0.00873654	0.00835992
Biological process	GO:0019882~antigen processing and presentation	7	2.45614	0.000264927	HLA-DMB, CD8A, HLA-DPB1, PSMB8, CTSS, HLA-DQA1, HLA-DQB1	275	55	16792	7.7715	0.353807	0.00948554	0.00907663
Biological process	GO:0006959~humoral immune response	7	2.45614	0.000322726	ST6GAL1, IL7, POU2AF1, SH2D1A, BLNK, MS4A1, PSMB10	275	57	16792	7.49882	0.412535	0.0110555	0.0105789
Biological process	GO:0046718~viral entry into host cell	8	2.80702	0.000328197	VAMP8, CD86, CR2, SELPLG, LAMP3, ITGB7, TNFRSF4, SLAMF1	275	80	16792	6.10618	0.417809	0.0110555	0.0105789
Biological process	GO:0019835~cytolysis	5	1.75439	0.000333456	GZMA, PRF1, GZMB, APOL1, GZMH	275	21	16792	14.5385	0.422835	0.0110555	0.0105789
Biological process	GO:0046641~positive regulation of alpha-beta T cell proliferation	4	1.40351	0.000335626	ZAP70, SYK, CD3E, CCR2	275	9	16792	27.1386	0.424896	0.0110555	0.0105789
Biological process	GO:0007204~positive regulation of cytosolic calcium ion concentration	10	3.50877	0.000355027	CD52, CXCR3, CD38, CXCR4, CCR7, CCR5, CD24, CXCL13, JAK2, CCR2	275	134	16792	4.55685	0.442999	0.0114108	0.0109189
Biological process	GO:0007257~activation of JUN kinase activity	6	2.10526	0.000360268	MAP4K1, CD40LG, SYK, WNT5A, TNFSF11, CCL19	275	38	16792	9.64134	0.447791	0.0114108	0.0109189
Biological process	GO:0090023~positive regulation of neutrophil chemotaxis	5	1.75439	0.000402359	RAC2, CCR7, CXCL1, NCKAP1L, CCL19	275	22	16792	13.8777	0.484811	0.0122719	0.0117429
Biological process	GO:0071345~cellular response to cytokine stimulus	5	1.75439	0.000402359	CD86, ITGA4, LEF1, CXCR4, CCR7	275	22	16792	13.8777	0.484811	0.0122719	0.0117429
Biological process	GO:0006915~apoptotic process	22	7.7193	0.000424087	CYFIP2, PRKCB, STAT1, GZMA, GPR65, ITGB2, PRF1, CXCR4, GZMB, GZMH, CD2, TPX2, AIM2, MELK, CXCR3, TNFSF10, PIM2, CD14, JAK2, S100A9, CTSC, BIRC3	275	567	16792	2.36924	0.502939	0.0126995	0.012152
Biological process	GO:0038083~peptidyl-tyrosine autophosphorylation	6	2.10526	0.000459903	ITK, ZAP70, SYK, LCK, MATK, JAK2	275	40	16792	9.15927	0.531441	0.0132231	0.0126531
Biological process	GO:0001771~immunological synapse formation	4	1.40351	0.000473688	PRF1, CCL19, DOCK2, CORO1A	275	10	16792	24.4247	0.541971	0.0132231	0.0126531
Biological process	GO:2000406~positive regulation of T cell migration	4	1.40351	0.000473688	CXCL10, ITGA4, CCL5, AIF1	275	10	16792	24.4247	0.541971	0.0132231	0.0126531
Biological process	GO:0010820~positive regulation of T cell chemotaxis	4	1.40351	0.000473688	CCL5, WNT5A, CXCL13, CCR2	275	10	16792	24.4247	0.541971	0.0132231	0.0126531
Biological process	GO:0045060~negative thymic T cell selection	4	1.40351	0.000643479	ZAP70, CCR7, DOCK2, CD3E	275	11	16792	22.2043	0.653819	0.0176635	0.016902
Biological process	GO:0030593~neutrophil chemotaxis	7	2.45614	0.000715076	CCL13, SYK, CCL5, ITGB2, NCKAP1L, CCL18, S100A9	275	66	16792	6.47625	0.692373	0.0193071	0.0184748
Biological process	GO:0019886~antigen processing and presentation of exogenous peptide antigen via MHC class II	8	2.80702	0.000766961	HLA-DMA, HLA-DMB, HLA-DPB1, KIF11, HLA-DOB, CTSS, HLA-DQA1, HLA-DQB1	275	92	16792	5.30972	0.717602	0.0203739	0.0194956
Biological process	GO:0043950~positive regulation of cAMP-mediated signaling	4	1.40351	0.000847649	CXCL10, CXCL11, CXCL9, CXCR3	275	12	16792	20.3539	0.75279	0.02216	0.0212047
Biological process	GO:0032729~positive regulation of interferon-gamma production	6	2.10526	0.000884781	KLRK1, WNT5A, HLA-DPB1, CD14, CD3E, CCR2	275	46	16792	7.96458	0.767477	0.0227693	0.0217877
Biological process	GO:0030335~positive regulation of cell migration	11	3.85965	0.000902162	COL1A1, LRRC15, CEMIP, SEMA4D, CCL5, LEF1, CDH13, ROR2, JAK2, AIF1, CORO1A	275	184	16792	3.65043	0.774048	0.0228594	0.021874
Biological process	GO:0032760~positive regulation of tumor necrosis factor production	6	2.10526	0.000977086	CD2, CYBA, CD14, CCL19, JAK2, RASGRP1	275	47	16792	7.79513	0.800317	0.0243827	0.0233316
Biological process	GO:0043547~positive regulation of GTPase activity	21	7.36842	0.00101603	CCL13, SEMA4D, CSF2RB, THY1, IL2RG, RASGRP1, ARHGAP25, GFRA2, ARHGAP45, ARHGAP4, DOCK10, ACAP1, FGF9, CCL5, CHN1, NCKAP1L, CCL19, DOCK2, JAK2, CCL18, EZH2	275	565	16792	2.26955	0.812742	0.0249762	0.0238995
Biological process	GO:0006909~phagocytosis	6	2.10526	0.00107636	ITGB2, ICAM3, CD14, ITGAL, CORO1A, SLAMF1	275	48	16792	7.63273	0.830481	0.0259867	0.0248665
Biological process	GO:0045730~respiratory burst	4	1.40351	0.0010887	CD52, CYBB, CYBA, CD24	275	13	16792	18.7883	0.833898	0.0259867	0.0248665
Biological process	GO:0038096~Fc-gamma receptor signaling pathway involved in phagocytosis	9	3.15789	0.00114126	CYFIP2, IGHG1, IGLV1-40, SYK, IGKC, PLCG2, CD3G, NCKAP1L, CD247	275	127	16792	4.32722	0.847695	0.0268522	0.0256947
Biological process	GO:0043542~endothelial cell migration	5	1.75439	0.00119437	FAP, STAT1, ITGB2, CDH13, LOXL2	275	29	16792	10.5279	0.860472	0.0277059	0.0265116
Biological process	GO:0045579~positive regulation of B cell differentiation	4	1.40351	0.00136897	ZAP70, SYK, CD27, NCKAP1L	275	14	16792	17.4462	0.8954	0.0308862	0.0295548
Biological process	GO:0032461~positive regulation of protein oligomerization	4	1.40351	0.00136897	AIM2, MMP1, MMP3, JCHAIN	275	14	16792	17.4462	0.8954	0.0308862	0.0295548
Biological process	GO:0030198~extracellular matrix organization	11	3.85965	0.00145411	COL1A1, ITGA4, SPOCK2, ITGB2, ITGAX, SPP1, ICAM3, ITGB7, ITGAL, NID2, LOXL1	275	196	16792	3.42694	0.909111	0.0323638	0.0309686
Biological process	GO:0007186~G-protein coupled receptor signaling pathway	28	9.82456	0.00168097	FCN1, CX3CR1, CCL13, CXCL6, CXCL9, GPR65, CXCR4, CXCL1, CXCR6, CXCL13, CD3E, CXCL5, ADGRE2, CCL5, CXCR3, GPR171, RAC2, CCR7, CCL19, JAK2, CCR5, CCL18, CCR2, FZD2, CXCL10, CXCL11, APLNR, GPR18	275	899	16792	1.90181	0.937499	0.0369141	0.0353228
Biological process	GO:0071346~cellular response to interferon-gamma	6	2.10526	0.00233693	CCL13, CCL5, WNT5A, CCL19, CCL18, AIF1	275	57	16792	6.42756	0.978843	0.0506437	0.0484605
Biological process	GO:0006911~phagocytosis, engulfment	5	1.75439	0.00243889	IGHM, IGHG1, IGKC, IGHD, AIF1	275	35	16792	8.72312	0.982122	0.0520813	0.0498361
Biological process	GO:0048535~lymph node development	4	1.40351	0.00246651	IL15, LTB, CXCL13, IL7R	275	17	16792	14.3675	0.98292	0.0520813	0.0498361
Biological process	GO:0071222~cellular response to lipopolysaccharide	8	2.80702	0.00253335	CX3CR1, CD86, CXCL10, KLRK1, WNT5A, LILRB2, CD14, CCR5	275	113	16792	4.32296	0.984706	0.0528156	0.0505388
Biological process	GO:0072540~T-helper 17 cell lineage commitment	3	1.05263	0.00256806	IRF4, LY9, BATF	275	5	16792	36.6371	0.985558	0.0528699	0.0505908
Biological process	GO:0042742~defense response to bacterium	9	3.15789	0.00263982	CXCL6, IGHG1, SYK, IGKC, GNLY, IGHD, CXCL13, CFP, S100A9	275	145	16792	3.79004	0.987173	0.0536763	0.0513624
Biological process	GO:0043066~negative regulation of apoptotic process	17	5.96491	0.00340931	BARD1, FCMR, MSX2, SEMA4D, BCL2A1, LEF1, WNT5A, AIF1, MMP9, CD40LG, IL7, UCP2, CD27, CD38, NCKAP1L, PIM2, BIRC3	275	455	16792	2.28143	0.996405	0.0684772	0.0655252
Biological process	GO:0030890~positive regulation of B cell proliferation	5	1.75439	0.003641	PTPRC, IL7, CD38, NCKAP1L, TNFRSF4	275	39	16792	7.82844	0.997549	0.0722498	0.0691352
Biological process	GO:0001768~establishment of T cell polarity	3	1.05263	0.00381065	CCR7, CCL19, DOCK2	275	6	16792	30.5309	0.998149	0.074716	0.0714951
Biological process	GO:0060337~type I interferon signaling pathway	6	2.10526	0.00388067	ISG20, IFI27, STAT1, IRF4, IFIT1, PSMB8	275	64	16792	5.72455	0.998351	0.0751937	0.0719522
Biological process	GO:0043113~receptor clustering	4	1.40351	0.00398839	ITGA4, ITGB2, ITGB7, ITGAL	275	20	16792	12.2124	0.99862	0.0756192	0.0723594
Biological process	GO:0045071~negative regulation of viral genome replication	5	1.75439	0.00399446	ISG20, APOBEC3F, APOBEC3G, CCL5, IFIT1	275	40	16792	7.63273	0.998634	0.0756192	0.0723594
Biological process	GO:0051209~release of sequestered calcium ion into cytosol	5	1.75439	0.00437041	PTPRC, LCK, PLCG2, CCR7, CCL19	275	41	16792	7.44656	0.999267	0.0817963	0.0782701
Biological process	GO:0002548~monocyte chemotaxis	5	1.75439	0.00476951	CCL13, CCL5, TNFSF11, CCL19, CCL18	275	42	16792	7.26926	0.999621	0.0882628	0.0844579
Biological process	GO:0070233~negative regulation of T cell apoptotic process	3	1.05263	0.0052776	CCL5, CD27, IDO1	275	7	16792	26.1694	0.999837	0.0965801	0.0924167
Biological process	GO:0051092~positive regulation of NF-kappaB transcription factor activity	8	2.80702	0.00620745	AIM2, CD40LG, PRKCB, WNT5A, ITGB2, TNFSF11, ADAM8, S100A9	275	133	16792	3.67289	0.999965	0.112348	0.107505
Biological process	GO:0045059~positive thymic T cell selection	3	1.05263	0.00696131	ZAP70, DOCK2, CD3D	275	8	16792	22.8982	0.99999	0.118199	0.113103
Biological process	GO:0010818~T cell chemotaxis	3	1.05263	0.00696131	CXCL10, CXCL11, CXCR3	275	8	16792	22.8982	0.99999	0.118199	0.113103
Biological process	GO:1902715~positive regulation of interferon-gamma secretion	3	1.05263	0.00696131	CD2, RASGRP1, SLAMF1	275	8	16792	22.8982	0.99999	0.118199	0.113103
Biological process	GO:0010529~negative regulation of transposition	3	1.05263	0.00696131	APOBEC3F, APOBEC3G, APOBEC3B	275	8	16792	22.8982	0.99999	0.118199	0.113103
Biological process	GO:0050862~positive regulation of T cell receptor signaling pathway	3	1.05263	0.00696131	LCK, CCR7, KCNN4	275	8	16792	22.8982	0.99999	0.118199	0.113103
Biological process	GO:0002456~T cell mediated immunity	3	1.05263	0.00696131	CD8A, BTN3A3, BTN3A2	275	8	16792	22.8982	0.99999	0.118199	0.113103
Biological process	GO:0002223~stimulatory C-type lectin receptor signaling pathway	7	2.45614	0.00748677	KLRK1, SYK, PLCG2, ICAM3, PSMB8, PSMB10, PSMB9	275	105	16792	4.07079	0.999996	0.124815	0.119434
Biological process	GO:0032735~positive regulation of interleukin-12 production	4	1.40351	0.00757831	CD40LG, CCR7, CCL19, IDO1	275	25	16792	9.76989	0.999996	0.124815	0.119434
Biological process	GO:0001816~cytokine production	4	1.40351	0.00757831	ITK, S100A9, RASGRP1, BATF	275	25	16792	9.76989	0.999996	0.124815	0.119434
Biological process	GO:0006816~calcium ion transport	6	2.10526	0.0080337	PRKCB, CCL5, ATP2A3, CCR5, KCNN4, CORO1A	275	76	16792	4.82067	0.999998	0.131005	0.125358
Biological process	GO:0006508~proteolysis	17	5.96491	0.00824412	FCN1, ADAMDEC1, MMP1, MMP3, GGH, MMP9, CTSS, GZMK, IGHG1, ADAM28, IGLV1-40, FAP, IGKC, ADAM8, LTA4H, CTSC, CFB	275	500	16792	2.0761	0.999999	0.133118	0.12738
Biological process	GO:0050871~positive regulation of B cell activation	4	1.40351	0.00846489	IGHM, IGHG1, IGKC, IGHD	275	26	16792	9.39413	0.999999	0.135356	0.129521
Biological process	GO:0014066~regulation of phosphatidylinositol 3-kinase signaling	6	2.10526	0.00894307	PPP1R16B, CD86, FGF9, LCK, CD19, RASGRP1	275	78	16792	4.69706	1	0.141627	0.135522
Biological process	GO:0019722~calcium-mediated signaling	5	1.75439	0.00950184	CXCR3, PLCG2, TNFSF11, CXCR4, CCR5	275	51	16792	5.98645	1	0.149043	0.142618
Biological process	GO:0016032~viral process	12	4.21053	0.0102911	CX3CR1, SYK, NUP210, MMP1, LCK, CD247, FCGR2B, IL2RG, PSMB8, PSMB10, PSMB9, CCR2	275	299	16792	2.45064	1	0.157354	0.150571
Biological process	GO:0006910~phagocytosis, recognition	4	1.40351	0.0104139	IGHM, IGHG1, IGKC, IGHD	275	28	16792	8.72312	1	0.157354	0.150571
Biological process	GO:0048247~lymphocyte chemotaxis	4	1.40351	0.0104139	CCL13, ADAM8, CCL19, CCL18	275	28	16792	8.72312	1	0.157354	0.150571
Biological process	GO:0010033~response to organic substance	4	1.40351	0.0104139	WNT5A, AQP9, CRIP1, CTSC	275	28	16792	8.72312	1	0.157354	0.150571
Biological process	GO:0033089~positive regulation of T cell differentiation in thymus	3	1.05263	0.0109495	ADAM8, IL7R, RASGRP1	275	10	16792	18.3185	1	0.163944	0.156877
Biological process	GO:0000165~MAPK cascade	11	3.85965	0.0111005	FGF9, CCL5, CSF2RB, CCR5, JAK2, IL2RG, GFRA2, RASGRP1, PSMB8, PSMB10, PSMB9	275	262	16792	2.56366	1	0.164708	0.157608
Biological process	GO:0030168~platelet activation	7	2.45614	0.0114511	COL1A1, CD40LG, SYK, PRKCB, LCK, PLCG2, RAC2	275	115	16792	3.71681	1	0.165822	0.158673
Biological process	GO:0002376~immune system process	4	1.40351	0.0114776	FCMR, LRMP, KCNN4, IDO1	275	29	16792	8.42232	1	0.165822	0.158673
Biological process	GO:0042113~B cell activation	4	1.40351	0.0114776	CD86, CD79A, ZAP70, PRKCB	275	29	16792	8.42232	1	0.165822	0.158673
Biological process	GO:0002523~leukocyte migration involved in inflammatory response	3	1.05263	0.0132398	ITGB2, ADAM8, S100A9	275	11	16792	16.6532	1	0.189616	0.181442
Biological process	GO:0006956~complement activation	6	2.10526	0.0139187	FCN1, IGHG1, IGLV1-40, IGKC, CFP, CFB	275	87	16792	4.21116	1	0.197621	0.189102
Biological process	GO:0007259~JAK-STAT cascade	4	1.40351	0.0150329	STAT1, NMI, JAK2, CCR2	275	32	16792	7.63273	1	0.211616	0.202494
Biological process	GO:0035556~intracellular signal transduction	14	4.91228	0.01542	MAP4K1, ITK, SYK, PRKCB, MAST1, CXCL1, ADCY7, ARHGAP45, ZAP70, MELK, CHN1, BLNK, PLCG2, JAK2	275	403	16792	2.12125	1	0.215226	0.205948
Biological process	GO:0045086~positive regulation of interleukin-2 biosynthetic process	3	1.05263	0.0157182	CD86, IRF4, CD3E	275	12	16792	15.2655	1	0.217545	0.208167
Biological process	GO:0007160~cell-matrix adhesion	6	2.10526	0.0159216	CD96, ITGA4, ITGB2, ITGB7, ITGAL, NID2	275	90	16792	4.07079	1	0.218523	0.209103
Biological process	GO:0048661~positive regulation of smooth muscle cell proliferation	5	1.75439	0.0165544	STAT1, CCL5, CDH13, CYBA, AIF1	275	60	16792	5.08848	1	0.225331	0.215617
Biological process	GO:0008283~cell proliferation	13	4.5614	0.0173204	MAP4K1, SYK, MATK, CXCL1, TYMS, CRIP1, ISG20, TPX2, MELK, TNFRSF17, PIM2, DLGAP5, PDK1	275	366	16792	2.16886	1	0.232433	0.222413
Biological process	GO:0060071~Wnt signaling pathway, planar cell polarity pathway	6	2.10526	0.0173584	FZD2, WNT5A, ROR2, PSMB8, PSMB10, PSMB9	275	92	16792	3.98229	1	0.232433	0.222413
Biological process	GO:0006874~cellular calcium ion homeostasis	6	2.10526	0.018108	CCL13, PRKCB, CCL5, ATP2A3, CCL19, CCR2	275	93	16792	3.93947	1	0.237636	0.227392
Biological process	GO:2000484~positive regulation of interleukin-8 secretion	3	1.05263	0.0183781	CD2, FCN1, WNT5A	275	13	16792	14.0912	1	0.237636	0.227392
Biological process	GO:0033630~positive regulation of cell adhesion mediated by integrin	3	1.05263	0.0183781	ZAP70, SYK, NCKAP1L	275	13	16792	14.0912	1	0.237636	0.227392
Biological process	GO:0000902~cell morphogenesis	5	1.75439	0.0184684	TENM4, LST1, ADAM8, IL7R, PSMB10	275	62	16792	4.92434	1	0.237636	0.227392
Biological process	GO:0016525~negative regulation of angiogenesis	5	1.75439	0.0184684	CX3CR1, CXCL10, STAT1, CXCR3, CCR2	275	62	16792	4.92434	1	0.237636	0.227392
Biological process	GO:0007568~aging	8	2.80702	0.0187645	CD86, BCL2A1, IL15, UCP2, ITGB2, TYMS, CTSC, LOXL2	275	165	16792	2.96057	1	0.239575	0.229247
Biological process	GO:0002479~antigen processing and presentation of exogenous peptide antigen via MHC class I, TAP-dependent	5	1.75439	0.0194747	CYBB, CYBA, PSMB8, PSMB10, PSMB9	275	63	16792	4.84618	1	0.24673	0.236094
Biological process	GO:0030574~collagen catabolic process	5	1.75439	0.0205143	COL1A1, MMP1, MMP3, MMP9, CTSS	275	64	16792	4.77045	1	0.257917	0.246798
Biological process	GO:2000147~positive regulation of cell motility	3	1.05263	0.0212129	SPOCK2, CCR7, CCL19	275	14	16792	13.0847	1	0.26269	0.251365
Biological process	GO:0035589~G-protein coupled purinergic nucleotide receptor signaling pathway	3	1.05263	0.0212129	P2RY10, P2RY6, GPR171	275	14	16792	13.0847	1	0.26269	0.251365
Biological process	GO:0046330~positive regulation of JNK cascade	5	1.75439	0.0215874	CD27, CCR7, CCL19, RASGRP1, SLAMF1	275	65	16792	4.69706	1	0.265332	0.253894
Biological process	GO:0007162~negative regulation of cell adhesion	4	1.40351	0.022192	ADAMDEC1, SEMA4D, CDH13, LPXN	275	37	16792	6.60128	1	0.270743	0.259071
Biological process	GO:0006958~complement activation, classical pathway	6	2.10526	0.0230552	IGHM, CR2, IGHG1, IGLV1-40, IGKC, IGHD	275	99	16792	3.70072	1	0.279205	0.267169
Biological process	GO:0008631~intrinsic apoptotic signaling pathway in response to oxidative stress	3	1.05263	0.0242164	MELK, JAK2, PDK1	275	15	16792	12.2124	1	0.289017	0.276558
Biological process	GO:0045582~positive regulation of T cell differentiation	3	1.05263	0.0242164	ZAP70, IL7, CD27	275	15	16792	12.2124	1	0.289017	0.276558
Biological process	GO:0016337~single organismal cell-cell adhesion	6	2.10526	0.0248803	CD2, CYFIP2, ICAM3, ADAM8, THY1, CD24	275	101	16792	3.62743	1	0.294804	0.282096
Biological process	GO:0007223~Wnt signaling pathway, calcium modulating pathway	4	1.40351	0.0254913	FZD2, WNT5A, LEF1, ROR2	275	39	16792	6.26275	1	0.299887	0.28696
Biological process	GO:0038095~Fc-epsilon receptor signaling pathway	8	2.80702	0.0270339	ITK, IGLV1-40, SYK, IGKC, PLCG2, PSMB8, PSMB10, PSMB9	275	178	16792	2.74435	1	0.315779	0.302166
Biological process	GO:0097190~apoptotic signaling pathway	5	1.75439	0.0287425	IFI27, CD38, CD14, CD3E, TNFRSF4	275	71	16792	4.30013	1	0.333373	0.319002
Biological process	GO:0030825~positive regulation of cGMP metabolic process	2	0.701754	0.0323693	FZD2, WNT5A	275	2	16792	61.0618	1	0.350738	0.335618
Biological process	GO:0097325~melanocyte proliferation	2	0.701754	0.0323693	FAP, WNT5A	275	2	16792	61.0618	1	0.350738	0.335618
Biological process	GO:2000473~positive regulation of hematopoietic stem cell migration	2	0.701754	0.0323693	PTPRC, CCR2	275	2	16792	61.0618	1	0.350738	0.335618
Biological process	GO:0072610~interleukin-12 secretion	2	0.701754	0.0323693	CCR7, CCL19	275	2	16792	61.0618	1	0.350738	0.335618
Biological process	GO:0003366~cell-matrix adhesion involved in ameboidal cell migration	2	0.701754	0.0323693	ITGA4, ITGB7	275	2	16792	61.0618	1	0.350738	0.335618
Biological process	GO:0038111~interleukin-7-mediated signaling pathway	2	0.701754	0.0323693	IL7R, IL2RG	275	2	16792	61.0618	1	0.350738	0.335618
Biological process	GO:1900020~positive regulation of protein kinase C activity	2	0.701754	0.0323693	CEMIP, WNT5A	275	2	16792	61.0618	1	0.350738	0.335618
Biological process	GO:0045404~positive regulation of interleukin-4 biosynthetic process	2	0.701754	0.0323693	CD86, IRF4	275	2	16792	61.0618	1	0.350738	0.335618
Biological process	GO:0043366~beta selection	2	0.701754	0.0323693	ZAP70, SYK	275	2	16792	61.0618	1	0.350738	0.335618
Biological process	GO:0018277~protein deamination	2	0.701754	0.0323693	LOXL1, LOXL2	275	2	16792	61.0618	1	0.350738	0.335618
Biological process	GO:0045429~positive regulation of nitric oxide biosynthetic process	4	1.40351	0.0328348	KLRK1, ITGB2, JAK2, AIF1	275	43	16792	5.68017	1	0.353457	0.33822
Biological process	GO:0045807~positive regulation of endocytosis	3	1.05263	0.0341767	WNT5A, CD14, CCL19	275	18	16792	10.177	1	0.361372	0.345794
Biological process	GO:0009615~response to virus	6	2.10526	0.0342283	ISG20, CCL5, CXCR4, PIM2, CCL19, IFIT1	275	110	16792	3.33064	1	0.361372	0.345794
Biological process	GO:0071356~cellular response to tumor necrosis factor	6	2.10526	0.0342283	COL1A1, CCL13, CCL5, CYBA, CCL19, CCL18	275	110	16792	3.33064	1	0.361372	0.345794
Biological process	GO:0043011~myeloid dendritic cell differentiation	3	1.05263	0.0377939	CD86, IRF4, BATF	275	19	16792	9.64134	1	0.396474	0.379383
Biological process	GO:0031145~anaphase-promoting complex-dependent catabolic process	5	1.75439	0.0402355	CDC20, PTTG1, PSMB8, PSMB10, PSMB9	275	79	16792	3.86467	1	0.414304	0.396444
Biological process	GO:0090630~activation of GTPase activity	5	1.75439	0.0402355	GPR65, WNT5A, CCR7, CXCL13, RASGRP1	275	79	16792	3.86467	1	0.414304	0.396444
Biological process	GO:0045766~positive regulation of angiogenesis	6	2.10526	0.0402481	CX3CR1, PRKCB, CXCR3, WNT5A, ITGB2, CYBB	275	115	16792	3.18583	1	0.414304	0.396444
Biological process	GO:0006461~protein complex assembly	6	2.10526	0.0415243	LPXN, CD3G, CAPG, KNTC1, NCKAP1L, CD3E	275	116	16792	3.15837	1	0.417274	0.399286
Biological process	GO:0019370~leukotriene biosynthetic process	3	1.05263	0.04155	SYK, ALOX5, LTA4H	275	20	16792	9.15927	1	0.417274	0.399286
Biological process	GO:0030101~natural killer cell activation	3	1.05263	0.04155	CD2, KLRK1, ITGB2	275	20	16792	9.15927	1	0.417274	0.399286
Biological process	GO:0097503~sialylation	3	1.05263	0.04155	ST6GAL1, ST8SIA1, ST8SIA4	275	20	16792	9.15927	1	0.417274	0.399286
Biological process	GO:0001503~ossification	5	1.75439	0.041831	CDH11, SPP1, TNFSF11, RUNX3, MMP9	275	80	16792	3.81636	1	0.41755	0.39955
Biological process	GO:0008284~positive regulation of cell proliferation	14	4.91228	0.0430642	CD86, IL15, ST8SIA1, LEF1, MATK, FOXM1, CXCL5, CDC20, CXCL10, FGF9, IL7, CXCR3, RAC2, SLAMF1	275	466	16792	1.83448	1	0.427269	0.40885
Biological process	GO:0006919~activation of cysteine-type endopeptidase activity involved in apoptotic process	5	1.75439	0.0468297	IFI27, LCK, TNFSF10, JAK2, S100A9	275	83	16792	3.67842	1	0.448136	0.428817
Biological process	GO:0090263~positive regulation of canonical Wnt signaling pathway	6	2.10526	0.0468724	COL1A1, FGF9, ROR2, PSMB8, PSMB10, PSMB9	275	120	16792	3.05309	1	0.448136	0.428817
Biological process	GO:0034112~positive regulation of homotypic cell-cell adhesion	2	0.701754	0.0481603	CCL5, TNFSF11	275	3	16792	40.7079	1	0.448136	0.428817
Biological process	GO:2000116~regulation of cysteine-type endopeptidase activity	2	0.701754	0.0481603	PSMB9, BIRC3	275	3	16792	40.7079	1	0.448136	0.428817
Biological process	GO:0071731~response to nitric oxide	2	0.701754	0.0481603	CCR7, CCL19	275	3	16792	40.7079	1	0.448136	0.428817
Biological process	GO:0045588~positive regulation of gamma-delta T cell differentiation	2	0.701754	0.0481603	SYK, NCKAP1L	275	3	16792	40.7079	1	0.448136	0.428817
Biological process	GO:1904845~cellular response to L-glutamine	2	0.701754	0.0481603	CYBB, CYBA	275	3	16792	40.7079	1	0.448136	0.428817
Biological process	GO:0002408~myeloid dendritic cell chemotaxis	2	0.701754	0.0481603	CCR7, CCL19	275	3	16792	40.7079	1	0.448136	0.428817
Biological process	GO:1904044~response to aldosterone	2	0.701754	0.0481603	CYBB, CYBA	275	3	16792	40.7079	1	0.448136	0.428817
Biological process	GO:0002534~cytokine production involved in inflammatory response	2	0.701754	0.0481603	CD96, IDO1	275	3	16792	40.7079	1	0.448136	0.428817
Biological process	GO:0002277~myeloid dendritic cell activation involved in immune response	2	0.701754	0.0481603	DOCK2, SLAMF1	275	3	16792	40.7079	1	0.448136	0.428817
Biological process	GO:0043123~positive regulation of I-kappaB kinase/NF-kappaB signaling	7	2.45614	0.0487325	PRKCB, TNFSF10, TNFSF11, CCR7, PIM2, CCL19, BIRC3	275	161	16792	2.65486	1	0.450038	0.430637
Biological process	GO:0050718~positive regulation of interleukin-1 beta secretion	3	1.05263	0.0494577	AIM2, WNT5A, CCL19	275	22	16792	8.32661	1	0.450038	0.430637
Biological process	GO:0002230~positive regulation of defense response to virus by host	3	1.05263	0.0494577	AIM2, APOBEC3F, APOBEC3G	275	22	16792	8.32661	1	0.450038	0.430637
Biological process	GO:0045453~bone resorption	3	1.05263	0.0494577	IL7, RAC2, TNFSF11	275	22	16792	8.32661	1	0.450038	0.430637
Biological process	GO:0006928~movement of cell or subcellular component	5	1.75439	0.0521459	VNN2, CXCR3, ITGAL, JAK2, CORO1A	275	86	16792	3.55011	1	0.471891	0.451549
Biological process	GO:0042493~response to drug	10	3.50877	0.0620857	COL1A1, CD86, STAT1, LCK, CYBB, GGH, CD38, CYBA, NCKAP1L, TYMS	275	304	16792	2.00861	1	0.532512	0.509556
Biological process	GO:0050715~positive regulation of cytokine secretion	3	1.05263	0.06223	SYK, CRTAM, CD14	275	25	16792	7.32742	1	0.532512	0.509556
Biological process	GO:0002040~sprouting angiogenesis	3	1.05263	0.06223	LEF1, CDH13, LOXL2	275	25	16792	7.32742	1	0.532512	0.509556
Biological process	GO:0016477~cell migration	7	2.45614	0.063	ADGRE2, SDC3, MATK, SDC1, LCP1, CD24, JAK2	275	172	16792	2.48507	1	0.532512	0.509556
Biological process	GO:0001666~response to hypoxia	7	2.45614	0.063	PRKCB, UCP2, CD38, CXCR4, CYBA, CD24, LOXL2	275	172	16792	2.48507	1	0.532512	0.509556
Biological process	GO:0046777~protein autophosphorylation	7	2.45614	0.063	MAP4K1, MELK, SYK, PIM2, THY1, JAK2, PASK	275	172	16792	2.48507	1	0.532512	0.509556
Biological process	GO:0019221~cytokine-mediated signaling pathway	6	2.10526	0.0635974	LRRC15, FLRT2, IL10RA, TNFSF11, JAK2, CCR2	275	131	16792	2.79672	1	0.532512	0.509556
Biological process	GO:0030260~entry into host cell	2	0.701754	0.0636945	CXCR4, CCR5	275	4	16792	30.5309	1	0.532512	0.509556
Biological process	GO:0016553~base conversion or substitution editing	2	0.701754	0.0636945	APOBEC3F, APOBEC3G	275	4	16792	30.5309	1	0.532512	0.509556
Biological process	GO:0042506~tyrosine phosphorylation of Stat5 protein	2	0.701754	0.0636945	IL15, JAK2	275	4	16792	30.5309	1	0.532512	0.509556
Biological process	GO:0002666~positive regulation of T cell tolerance induction	2	0.701754	0.0636945	LILRB2, IDO1	275	4	16792	30.5309	1	0.532512	0.509556
Biological process	GO:0097411~hypoxia-inducible factor-1alpha signaling pathway	2	0.701754	0.0636945	CYBB, PDK1	275	4	16792	30.5309	1	0.532512	0.509556
Biological process	GO:0033634~positive regulation of cell-cell adhesion mediated by integrin	2	0.701754	0.0636945	CCL5, CXCL13	275	4	16792	30.5309	1	0.532512	0.509556
Biological process	GO:0033625~positive regulation of integrin activation	2	0.701754	0.0636945	PLEK, CXCL13	275	4	16792	30.5309	1	0.532512	0.509556
Biological process	GO:0002283~neutrophil activation involved in immune response	2	0.701754	0.0636945	ZAP70, SYK	275	4	16792	30.5309	1	0.532512	0.509556
Biological process	GO:0002053~positive regulation of mesenchymal cell proliferation	3	1.05263	0.0667104	FGF9, STAT1, WNT5A	275	26	16792	7.04559	1	0.54936	0.525678
Biological process	GO:0035025~positive regulation of Rho protein signal transduction	3	1.05263	0.0667104	P2RY10, GPR65, GPR18	275	26	16792	7.04559	1	0.54936	0.525678
Biological process	GO:0045070~positive regulation of viral genome replication	3	1.05263	0.0667104	TOP2A, CCL5, IFIT1	275	26	16792	7.04559	1	0.54936	0.525678
Biological process	GO:0070374~positive regulation of ERK1 and ERK2 cascade	7	2.45614	0.0674324	CCL13, CCL5, CCR7, CCL19, CCL18, RASGRP1, SLAMF1	275	175	16792	2.44247	1	0.552543	0.528724
Biological process	GO:0051056~regulation of small GTPase mediated signal transduction	6	2.10526	0.068672	CHN1, RAC2, RHOH, ARHGAP25, ARHGAP45, ARHGAP4	275	134	16792	2.73411	1	0.559915	0.535778
Biological process	GO:0043029~T cell homeostasis	3	1.05263	0.0712944	SIT1, NCKAP1L, CORO1A	275	27	16792	6.78465	1	0.570711	0.546108
Biological process	GO:0042104~positive regulation of activated T cell proliferation	3	1.05263	0.0712944	CD86, CD24, SLAMF1	275	27	16792	6.78465	1	0.570711	0.546108
Biological process	GO:0035987~endodermal cell differentiation	3	1.05263	0.0712944	ITGA4, ITGB2, MMP9	275	27	16792	6.78465	1	0.570711	0.546108
Biological process	GO:0071407~cellular response to organic cyclic compound	4	1.40351	0.0717287	P2RY6, STAT1, CCL5, CYBA	275	59	16792	4.13978	1	0.570711	0.546108
Biological process	GO:0043406~positive regulation of MAP kinase activity	4	1.40351	0.0717287	TNFSF11, CD24, RASGRP1, EZH2	275	59	16792	4.13978	1	0.570711	0.546108
Biological process	GO:0043392~negative regulation of DNA binding	3	1.05263	0.0759775	GZMA, LEF1, JAK2	275	28	16792	6.54234	1	0.593057	0.567491
Biological process	GO:0050690~regulation of defense response to virus by virus	3	1.05263	0.0759775	LCK, CD247, DOCK2	275	28	16792	6.54234	1	0.593057	0.567491
Biological process	GO:0051482~positive regulation of cytosolic calcium ion concentration involved in phospholipase C-activating G-protein coupled signaling pathway	3	1.05263	0.0759775	P2RY10, GPR65, GPR18	275	28	16792	6.54234	1	0.593057	0.567491
Biological process	GO:0043388~positive regulation of DNA binding	3	1.05263	0.0759775	IRF4, JAK2, MMP9	275	28	16792	6.54234	1	0.593057	0.567491
Biological process	GO:0009967~positive regulation of signal transduction	4	1.40351	0.077588	CHN1, SH2D1A, BLNK, ARHGAP4	275	61	16792	4.00405	1	0.596668	0.570947
Biological process	GO:0097029~mature conventional dendritic cell differentiation	2	0.701754	0.0789761	CCR7, CCL19	275	5	16792	24.4247	1	0.596668	0.570947
Biological process	GO:0009157~deoxyribonucleoside monophosphate biosynthetic process	2	0.701754	0.0789761	TK1, TYMS	275	5	16792	24.4247	1	0.596668	0.570947
Biological process	GO:0002503~peptide antigen assembly with MHC class II protein complex	2	0.701754	0.0789761	HLA-DMA, HLA-DMB	275	5	16792	24.4247	1	0.596668	0.570947
Biological process	GO:0045836~positive regulation of meiotic nuclear division	2	0.701754	0.0789761	DAZL, WNT5A	275	5	16792	24.4247	1	0.596668	0.570947
Biological process	GO:0019060~intracellular transport of viral protein in host cell	2	0.701754	0.0789761	TAP1, IFIT1	275	5	16792	24.4247	1	0.596668	0.570947
Biological process	GO:0001915~negative regulation of T cell mediated cytotoxicity	2	0.701754	0.0789761	PTPRC, IL7R	275	5	16792	24.4247	1	0.596668	0.570947
Biological process	GO:0045893~positive regulation of transcription, DNA-templated	14	4.91228	0.0802025	CD86, FZD2, STAT1, LEF1, WNT5A, FOXM1, RUNX3, COL1A1, IRF4, NFE2L3, CD38, PIM2, ROR2, MYBL1	275	515	16792	1.65993	1	0.601828	0.575884
Biological process	GO:0048873~homeostasis of number of cells within a tissue	3	1.05263	0.0807553	IL7, CD7, CORO1A	275	29	16792	6.31674	1	0.601828	0.575884
Biological process	GO:0097421~liver regeneration	3	1.05263	0.0807553	UCP2, TYMS, EZH2	275	29	16792	6.31674	1	0.601828	0.575884
Biological process	GO:0048706~embryonic skeletal system development	3	1.05263	0.0856234	COL1A1, FGF9, WNT5A	275	30	16792	6.10618	1	0.635233	0.607849
Biological process	GO:0001649~osteoblast differentiation	5	1.75439	0.0905251	COL1A1, MSX2, FGF9, LEF1, SPP1	275	104	16792	2.93566	1	0.668587	0.639765
Biological process	GO:0038061~NIK/NF-kappaB signaling	4	1.40351	0.093109	PSMB8, PSMB10, PSMB9, BIRC3	275	66	16792	3.70072	1	0.673188	0.644167
Biological process	GO:0090330~regulation of platelet aggregation	2	0.701754	0.0940092	ZAP70, SYK	275	6	16792	20.3539	1	0.673188	0.644167
Biological process	GO:0023052~signaling	2	0.701754	0.0940092	CCR5, DLGAP5	275	6	16792	20.3539	1	0.673188	0.644167
Biological process	GO:2000107~negative regulation of leukocyte apoptotic process	2	0.701754	0.0940092	CCR7, CCL19	275	6	16792	20.3539	1	0.673188	0.644167
Biological process	GO:0048525~negative regulation of viral process	2	0.701754	0.0940092	APOBEC3F, APOBEC3G	275	6	16792	20.3539	1	0.673188	0.644167
Biological process	GO:0070245~positive regulation of thymocyte apoptotic process	2	0.701754	0.0940092	WNT5A, ADAM8	275	6	16792	20.3539	1	0.673188	0.644167
Biological process	GO:0048341~paraxial mesoderm formation	2	0.701754	0.0940092	WNT5A, LEF1	275	6	16792	20.3539	1	0.673188	0.644167
Cellular component	GO:0009897~external side of plasma membrane	31	10.8772	1.61393e-20	CD86, IGHM, CXCL9, THY1, CD3E, IL2RG, CD79B, CD79A, IGHG1, KLRK1, IGKC, CXCR3, CD19, ITGAX, CCR7, CCR5, SLAMF1, LAG3, CD2, CXCL10, PTPRC, CD40LG, SELL, CD8A, IGHD, CD27, SDC1, CDH13, CD48, IL7R, MS4A1	279	213	18224	9.50652	3.93799e-18	3.93799e-18	3.74432e-18
Cellular component	GO:0005886~plasma membrane	124	43.5088	6.70266e-16	CD86, GPR65, CLEC10A, TRAC, AQP9, PRF1, ICAM3, SIT1, LAMP3, TRBC1, TNFSF11, KNTC1, SLC39A8, PLXNC1, TNFRSF4, PPP1R16B, CD96, ENTPD1, PRKCB, WNT5A, CYBB, CYBA, MELK, CD8A, APLNR, ADAM8, ROR2, PTPRCAP, S100A9, CFB, CEMIP, KLRB1, SDC3, CSF2RB, THY1, RASGRP1, CORO1A, LY9, CD79B, CD79A, KLRK1, IGLV1-40, FLRT2, CD19, PLCG2, TNFRSF17, LPXN, CD14, LTA4H, KCNN4, HLA-DQA1, FZD2, OSBPL3, CRTAM, PTPRC, SELL,…	279	4121	18224	1.96543	1.62537e-13	8.17725e-14	7.77509e-14
Cellular component	GO:0005887~integral component of plasma membrane	63	22.1053	2.04122e-14	TENM4, GPR65, AQP9, LY75, ATP2A3, ICAM3, CD3G, LRMP, CD3E, SIT1, SCN9A, GPR171, TNFSF10, TNFSF11, CD37, SLC39A8, PLXNC1, CCR5, TNFRSF4, CCR2, CD52, CD96, ENTPD1, IL15, CYBB, TAP1, CD8A, APLNR, CD48, ADAM8, ROR2, MS4A1, CX3CR1, SELPLG, CSF2RB, THY1, CXCR6, IL2RG, CD79B, CD79A, P2RY6, KLRK1, FLRT2, CXCR3, CD19, NCKAP1L, HLA-DQA1, P2RY10, CD72, SEMA4D, CRTAM, NKG7, LILRB2, LILRB3, CD2, P2RX5, PTPRC,…	279	1415	18224	2.9082	4.98446e-12	1.66019e-12	1.57854e-12
Cellular component	GO:0005615~extracellular space	53	18.5965	4.07258e-10	IGHM, CXCL6, CXCL9, SERPINA1, CXCL1, CTSW, CXCL13, LOXL1, CXCL5, CTSS, LOXL2, JCHAIN, IGHG1, FGF9, GNLY, CA2, TNFSF10, TNFSF11, CTSC, IL15, WNT5A, MMP3, FRMD4B, MMP9, CDH13, LTB, LCP1, S100A9, MS4A1, SMPDL3A, CFB, CCL13, CFP, CST7, IGKC, FLRT2, CCL5, ALOX5, SPP1, CD14, CCL19, CCL18, APOL1, IL32, SEMA4D, GGH, LILRB2, COL1A1, CXCL10, CXCL11, CD40LG, FAP, IL7	279	1347	18224	2.57009	9.9371e-08	2.48428e-08	2.3621e-08
Cellular component	GO:0016020~membrane	68	23.8596	1.66188e-08	CYFIP2, LST1, PLEK, ITGB2, PRF1, ICAM3, CD3G, LRMP, CTSW, KIF11, ITGAL, LOXL2, DOCK10, ADGRE2, LAMP3, TRBC1, ITGAX, RAC2, TNFSF11, CD38, CD37, ITGB7, PLXNC1, JAK2, CTSC, MAP4K1, CD52, ENTPD1, NUP210, ITGA4, IL15, TAP1, BTN3A3, CYBA, BTN3A2, ARHGAP45, VAMP8, ACAP1, MELK, IRF4, CDH11, CD48, DOCK2, HLA-DQB1, SELPLG, SDC3, IL2RG, RASGRP1, CORO1A, HLA-DMA, LPXN, NCKAP1L, HLA-DQA1, IL32, OSBPL3, GZMB, …	279	2200	18224	2.01895	4.05497e-06	8.10996e-07	7.71111e-07
Cellular component	GO:0009986~cell surface	28	9.82456	7.39814e-08	CD86, IGHM, SDC3, ITGB2, CXCR4, ITGAL, LY9, HLA-DMA, KLRK1, ITGAX, CD38, CCR7, ITGB7, CCR5, TNFRSF4, SLAMF1, ITGA4, IL15, WNT5A, LILRB2, CD2, PTPRC, CD40LG, FAP, HLA-DPB1, SDC1, ADAM8, CD24	279	542	18224	3.37441	1.80513e-05	3.00858e-06	2.86061e-06
Cellular component	GO:0042101~T cell receptor complex	7	2.45614	1.90023e-07	ZAP70, SYK, CD8A, CD3G, CD247, CD3E, CD3D	279	18	18224	25.4018	4.63645e-05	6.62365e-06	6.29789e-06
Cellular component	GO:0005576~extracellular region	52	18.2456	3.95388e-07	FCN1, CXCL6, ADAMDEC1, CXCL9, FCMR, SERPINA1, PLEK, PRF1, CXCL1, CTSW, CXCL13, LOXL1, CXCL5, CTSS, JCHAIN, IGHG1, FGF9, TNFSF10, TNFSF11, IL15, MMP1, WNT5A, MMP3, MMP9, CD8A, S100A9, CFB, CCL13, CEMIP, AOAH, CFP, PLA2G7, NID2, ADAM28, IGLV1-40, IGKC, CCL5, SPP1, CD14, CCL19, APOL1, GBP1, GZMA, CD2, GZMK, COL1A1, CXCL10, CXCL11, IL7, PNOC, CD27, IL7R	279	1610	18224	2.10968	9.64701e-05	1.20593e-05	1.14663e-05
Cellular component	GO:0001772~immunological synapse	8	2.80702	6.74048e-07	ZAP70, LCK, GZMA, GZMB, RHOH, CD37, CD3E, CORO1A	279	34	18224	15.3692	0.000164454	1.82742e-05	1.73755e-05
Cellular component	GO:0016021~integral component of membrane	116	40.7018	1.80514e-06	CD86, FCMR, TRAF3IP3, GPR65, CLEC10A, LST1, TRAC, AQP9, PRF1, LY75, ICAM3, CXCL13, IGHG1, SIT1, LAMP3, GPR171, TRBC1, TNFSF10, TNFSF11, SLC39A8, HLA-DOB, CD96, LAG3, ST6GAL1, ENTPD1, NUP210, WNT5A, CYBB, TAP1, CYBA, BSCL2, IFI27, CD8A, APLNR, VOPP1, ADAM8, ROR2, PTPRCAP, RTN1, KLRB1, SDC3, CSF2RB, LY9, SEL1L3, CD79A, KLRK1, FLRT2, CD19, TNFRSF17, KCNN4, HLA-DQA1, SLAMF1, FZD2, ST8SIA1, NKG7, COL1…	279	5163	18224	1.46756	0.000440357	4.40453e-05	4.18792e-05
Cellular component	GO:0042613~MHC class II protein complex	6	2.10526	1.69637e-05	HLA-DMA, HLA-DMB, HLA-DPB1, HLA-DOB, HLA-DQA1, HLA-DQB1	279	22	18224	17.8143	0.00413062	0.000376285	0.00035778
Cellular component	GO:0042105~alpha-beta T cell receptor complex	4	1.40351	3.43313e-05	CD3G, CD247, CD3E, CD3D	279	5	18224	52.2552	0.00834198	0.000698069	0.000663738
Cellular component	GO:0070062~extracellular exosome	66	23.1579	0.000297554	CD86, CYFIP2, IGHM, SERPINA1, ITGB2, LY75, ICAM3, ITGAL, JCHAIN, DOCK10, IGHG1, FGF9, SIT1, CA2, TNFSF10, RAC2, CD38, CD37, ITGB7, CTSC, ENTPD1, ST6GAL1, CR2, ITGA4, PRKCB, WNT5A, MMP9, VAMP8, LCK, CDH11, IGHD, CDH13, CD48, LCP1, DOCK2, S100A9, MXRA5, MS4A1, SMPDL3A, CFB, LRRC15, CXCR4, CAPG, THY1, NID2, CORO1A, CD79B, HLA-DMA, IGKC, FLRT2, CD19, SPP1, PLCG2, NCKAP1L, CD14, LTA4H, SLAMF1, GGH, LI…	279	2811	18224	1.53364	0.0700404	0.00558487	0.0053102
Cellular component	GO:0030669~clathrin-coated endocytic vesicle membrane	6	2.10526	0.000380994	FZD2, WNT5A, HLA-DPB1, ROR2, HLA-DQA1, HLA-DQB1	279	41	18224	9.55888	0.0887886	0.00664019	0.00631362
Cellular component	GO:0019815~B cell receptor complex	3	1.05263	0.000688612	CD79B, CD79A, SYK	279	3	18224	65.319	0.154713	0.010755	0.0102261
Cellular component	GO:0008305~integrin complex	5	1.75439	0.000705248	ITGA4, ITGB2, ITGAX, ITGB7, ITGAL	279	27	18224	12.0961	0.15814	0.010755	0.0102261
Cellular component	GO:1990111~spermatoproteasome complex	3	1.05263	0.00224934	PSMB8, PSMB10, PSMB9	279	5	18224	39.1914	0.422736	0.0322846	0.0306968
Cellular component	GO:0031234~extrinsic component of cytoplasmic side of plasma membrane	6	2.10526	0.00379639	ITK, ZAP70, SYK, LCK, MATK, JAK2	279	68	18224	5.76344	0.604689	0.0514622	0.0489313
Cellular component	GO:0045121~membrane raft	10	3.50877	0.0044619	CD79A, ZAP70, PTPRC, LCK, CD48, CD14, THY1, CD24, JAK2, BIRC3	279	206	18224	3.17083	0.664167	0.0573002	0.0544822
Cellular component	GO:0072562~blood microparticle	7	2.45614	0.0292616	IGHM, IGHG1, IGKC, IGHD, APOL1, CFB, JCHAIN	279	152	18224	3.00811	0.999287	0.30782	0.292681
Cellular component	GO:0034669~integrin alpha4-beta7 complex	2	0.701754	0.0302773	ITGA4, ITGB7	279	2	18224	65.319	0.999448	0.30782	0.292681
Cellular component	GO:0071756~pentameric IgM immunoglobulin complex	2	0.701754	0.0302773	IGHM, JCHAIN	279	2	18224	65.319	0.999448	0.30782	0.292681
Cellular component	GO:0071757~hexameric IgM immunoglobulin complex	2	0.701754	0.0302773	IGHM, JCHAIN	279	2	18224	65.319	0.999448	0.30782	0.292681
Cellular component	GO:0034687~integrin alphaL-beta2 complex	2	0.701754	0.0302773	ITGB2, ITGAL	279	2	18224	65.319	0.999448	0.30782	0.292681
Cellular component	GO:0001891~phagocytic cup	3	1.05263	0.0334256	LCP1, AIF1, CORO1A	279	19	18224	10.3135	0.99975	0.313686	0.298259
Cellular component	GO:0042571~immunoglobulin complex, circulating	3	1.05263	0.0334256	IGHG1, IGKC, IGHD	279	19	18224	10.3135	0.99975	0.313686	0.298259
Cellular component	GO:0032587~ruffle membrane	5	1.75439	0.0367329	ADGRE2, FAP, PLEK, LCP1, AIF1	279	82	18224	3.98287	0.999892	0.328277	0.312132
Cellular component	GO:0005925~focal adhesion	12	4.21053	0.0376711	FZD2, PTPRC, FLRT2, ITGA4, FAP, RAC2, CDH13, LPXN, SDC1, CYBA, LCP1, THY1	279	391	18224	2.00468	0.999915	0.328277	0.312132
Cellular component	GO:0005839~proteasome core complex	3	1.05263	0.0402422	PSMB8, PSMB10, PSMB9	279	21	18224	9.33129	0.999956	0.338589	0.321937
Cellular component	GO:0031362~anchored component of external side of plasma membrane	3	1.05263	0.0438301	CD14, THY1, CD24	279	22	18224	8.90714	0.999982	0.343672	0.32677
Cellular component	GO:0005737~cytoplasm	94	32.9825	0.0445452	TOP2A, CYFIP2, TENM4, LST1, MAST1, PLEK, KIF11, FOXM1, IFIT1, CD3D, ARHGAP4, CDC20, PTTG1, FGF9, CA2, BLNK, RAC2, TNFSF11, KNTC1, PIM2, JAK2, CCR5, CYTIP, DLGAP5, CCR2, MAP4K1, TPD52, CD96, SYK, IL15, PRKCB, RHOH, BTN3A3, FRMD4B, PASK, RUNX3, VAMP8, ZAP70, GAP43, AIM2, IRF4, TFEC, CDH11, CDH13, ADAM8, LCP1, BIRC3, LRRC15, CEMIP, LEF1, CXCR4, CAPG, NREP, TYMS, CST7, PLA2G7, CORO1A, AIF1, CRIP1, PS…	279	5222	18224	1.17579	0.999985	0.343672	0.32677
Cellular component	GO:0030895~apolipoprotein B mRNA editing enzyme complex	2	0.701754	0.0450717	APOBEC3F, APOBEC3G	279	3	18224	43.546	0.999987	0.343672	0.32677
Cellular component	GO:0002102~podosome	3	1.05263	0.0513432	LPXN, ADAM8, LCP1	279	24	18224	8.16487	0.999997	0.379629	0.360959
Cellular component	GO:0030670~phagocytic vesicle membrane	4	1.40351	0.0611665	RAC2, CYBB, CYBA, CORO1A	279	59	18224	4.42841	1	0.43896	0.417371
Cellular component	GO:0071556~integral component of lumenal side of endoplasmic reticulum membrane	3	1.05263	0.071901	HLA-DPB1, HLA-DQA1, HLA-DQB1	279	29	18224	6.75714	1	0.501252	0.476601
Cellular component	GO:0043657~host cell	2	0.701754	0.0739891	TAP1, IFIT1	279	5	18224	26.1276	1	0.501482	0.476819
Cellular component	GO:0005884~actin filament	4	1.40351	0.0769998	RAC2, LCP1, AIF1, CORO1A	279	65	18224	4.01963	1	0.507783	0.48281
Cellular component	GO:0030666~endocytic vesicle membrane	4	1.40351	0.0797977	WNT5A, HLA-DPB1, HLA-DQA1, HLA-DQB1	279	66	18224	3.95873	1	0.512385	0.487186
Cellular component	GO:0000922~spindle pole	5	1.75439	0.085612	CDC20, TPX2, LRMP, KNTC1, KIF11	279	109	18224	2.99628	1	0.535624	0.509281
Cellular component	GO:0031225~anchored component of membrane	5	1.75439	0.0946673	CD52, VNN2, CDH13, CD48, GFRA2	279	113	18224	2.89022	1	0.575231	0.546941
Cellular component	GO:0005635~nuclear envelope	6	2.10526	0.0966577	NUP210, ALOX5, SP140, RAC2, CYBB, LRMP	279	159	18224	2.46487	1	0.575231	0.546941
Molecular function	GO:0004872~receptor activity	21	7.36842	1.74093e-10	CD86, SEMA4D, IL10RA, ITGB2, CRTAM, LY75, CSF2RB, LILRB2, LILRB3, GFRA2, LILRB4, CD2, KLRK1, CXCR3, CD7, ITGAX, APLNR, TNFRSF17, CD48, ITGB7, SLAMF1	262	217	16881	6.23529	7.69492e-08	7.71233e-08	7.39896e-08
Molecular function	GO:0008009~chemokine activity	11	3.85965	3.17811e-09	CXCL6, CCL13, CXCL10, CXCL11, CXCL9, CCL5, CXCL1, CCL19, CXCL13, CCL18, CXCL5	262	49	16881	14.4642	1.40472e-06	7.03951e-07	6.75348e-07
Molecular function	GO:0004888~transmembrane signaling receptor activity	17	5.96491	2.28667e-07	CR2, LAG3, CD72, SEMA4D, KLRB1, LY75, CD3G, LILRB3, CD3E, CD3D, CD79B, CD79A, P2RX5, CD27, CD247, FCGR2B, SLAMF1	262	214	16881	5.11837	0.000101066	3.37665e-05	3.23945e-05
Molecular function	GO:0003823~antigen binding	12	4.21053	5.55737e-07	IGHM, IGHG1, LAG3, IGLV1-40, IGKC, ITGA4, IGHD, CD48, IL7R, LILRB4, SLAMF1, JCHAIN	262	103	16881	7.50656	0.000245606	6.15479e-05	5.9047e-05
Molecular function	GO:0050839~cell adhesion molecule binding	9	3.15789	4.81979e-06	SELL, TENM4, ITGA4, ITGB2, CRTAM, ADAM8, ITGB7, LILRB2, ITGAL	262	62	16881	9.35293	0.00212809	0.000427034	0.000409682
Molecular function	GO:0004252~serine-type endopeptidase activity	16	5.61404	1.06641e-05	FCN1, MMP1, GZMA, MMP3, GZMB, MMP9, CTSS, GZMH, GZMK, IGHG1, IGLV1-40, FAP, IGKC, ADAM8, CTSC, CFB	262	255	16881	4.04275	0.00470244	0.000787362	0.00075537
Molecular function	GO:0048248~CXCR3 chemokine receptor binding	4	1.40351	3.57096e-05	CXCL10, CXCL11, CXCL9, CXCL13	262	5	16881	51.545	0.01566	0.0022599	0.00216808
Molecular function	GO:0032395~MHC class II receptor activity	5	1.75439	6.66516e-05	HLA-DMA, HLA-DPB1, HLA-DOB, HLA-DQA1, HLA-DQB1	262	15	16881	21.4771	0.0290313	0.00354004	0.0033962
Molecular function	GO:0004715~non-membrane spanning protein tyrosine kinase activity	7	2.45614	7.19196e-05	ITK, ZAP70, MELK, SYK, LCK, MATK, JAK2	262	46	16881	9.80476	0.0312896	0.00354004	0.0033962
Molecular function	GO:0015026~coreceptor activity	6	2.10526	8.83039e-05	CD86, ITGA4, CD8A, CXCR4, CXCR6, CCR5	262	30	16881	12.8863	0.0382801	0.00375948	0.00360672
Molecular function	GO:0005515~protein binding	167	58.5965	9.5334e-05	CYFIP2, FCN1, CD86, TRAF3IP3, PRF1, ICAM3, IFIT1, LOXL2, CDC20, LGALS2, IGHG1, TCL1A, PTTG1, TDO2, SIT1, TNFSF10, KNTC1, PIM2, PLXNC1, PDK1, PPP1R16B, TPD52, ST6GAL1, ENTPD1, MSX2, PRKCB, WNT5A, MATK, CYBB, TAP1, CYBA, PASK, RUNX3, ARHGAP45, BSCL2, ACAP1, MELK, CD8A, ADAM8, ROR2, S100A9, CEMIP, RTN1, SP140, CSF2RB, NREP, THY1, NID2, CORO1A, RAD51AP1, CD79B, CD79A, KLRK1, CD19, PLCG2, LPXN, NCKAP1…	262	8785	16881	1.22482	0.0412641	0.00375948	0.00360672
Molecular function	GO:0001618~virus receptor activity	8	2.80702	0.000101837	CD86, CR2, SELPLG, CXCR4, ITGB7, CCR5, TNFRSF4, SLAMF1	262	70	16881	7.36358	0.0440161	0.00375948	0.00360672
Molecular function	GO:0005102~receptor binding	17	5.96491	0.000127387	CD86, CCL13, ITK, SELPLG, CD72, SEMA4D, CRTAM, MATK, ICAM3, CXCL1, CD2, CXCL10, ZAP70, TNFSF10, PLXNC1, LTB, JAK2	262	353	16881	3.10292	0.0547525	0.00434095	0.00416456
Molecular function	GO:0034987~immunoglobulin receptor binding	5	1.75439	0.000638577	IGHM, IGHG1, IGKC, IGHD, JCHAIN	262	26	16881	12.3906	0.245984	0.0202064	0.0193854
Molecular function	GO:0005164~tumor necrosis factor receptor binding	5	1.75439	0.000978278	CD40LG, STAT1, TNFSF10, TNFSF11, LTB	262	29	16881	11.1088	0.351187	0.027673	0.0265486
Molecular function	GO:0042803~protein homodimerization activity	24	8.42105	0.000999477	BARD1, TOP2A, TPD52, CR2, APOBEC3G, BCL2A1, TENM4, STAT1, GZMA, PLEK, CRTAM, TAP1, TYMS, RASGRP1, CORO1A, JCHAIN, CD2, KLRK1, FAP, CD8A, CCL5, CDH13, CD247, CCR2	262	730	16881	2.11829	0.357244	0.027673	0.0265486
Molecular function	GO:0005125~cytokine activity	10	3.50877	0.00169916	IL32, CXCL9, CD40LG, IL15, IL7, WNT5A, TNFSF10, SPP1, TNFSF11, LTB	262	176	16881	3.66087	0.528421	0.0433813	0.0416186
Molecular function	GO:0023026~MHC class II protein complex binding	4	1.40351	0.00176267	HLA-DMA, HLA-DMB, MS4A1, HLA-DOB	262	16	16881	16.1078	0.541497	0.0433813	0.0416186
Molecular function	GO:0004950~chemokine receptor activity	4	1.40351	0.00211608	CX3CR1, CXCR3, CCR5, CCR2	262	17	16881	15.1603	0.607924	0.0493382	0.0473335
Molecular function	GO:0042288~MHC class I protein binding	4	1.40351	0.00294741	KLRK1, CD8A, TAP1, LILRB2	262	19	16881	13.5645	0.72874	0.0652851	0.0626324
Molecular function	GO:0042608~T cell receptor binding	3	1.05263	0.00342851	CD3G, DOCK2, CD3E	262	6	16881	32.2156	0.780852	0.0723253	0.0693866
Molecular function	GO:0016494~C-X-C chemokine receptor activity	3	1.05263	0.00475106	CXCR3, CXCR4, CXCR6	262	7	16881	27.6134	0.878151	0.0956691	0.0917819
Molecular function	GO:0045236~CXCR chemokine receptor binding	3	1.05263	0.00798004	CXCL6, CXCL1, CXCL5	262	9	16881	21.4771	0.971025	0.151933	0.145759
Molecular function	GO:0004222~metalloendopeptidase activity	7	2.45614	0.00823112	ADAMDEC1, ADAM28, FAP, MMP1, MMP3, ADAM8, MMP9	262	113	16881	3.99132	0.974092	0.151933	0.145759
Molecular function	GO:0042605~peptide antigen binding	4	1.40351	0.00899637	HLA-DPB1, TAP1, HLA-DQA1, HLA-DQB1	262	28	16881	9.20447	0.981581	0.159416	0.152938
Molecular function	GO:0016814~hydrolase activity, acting on carbon-nitrogen (but not peptide) bonds, in cyclic amidines	3	1.05263	0.0119459	APOBEC3F, APOBEC3G, APOBEC3B	262	11	16881	17.5722	0.995067	0.20354	0.195269
Molecular function	GO:0016493~C-C chemokine receptor activity	3	1.05263	0.0141901	CCR7, CCR5, CCR2	262	12	16881	16.1078	0.998195	0.232823	0.223362
Molecular function	GO:0004713~protein tyrosine kinase activity	7	2.45614	0.0173525	ZAP70, SYK, FGF9, LCK, MATK, CSF2RB, JAK2	262	133	16881	3.39112	0.999564	0.274541	0.263386
Molecular function	GO:0045028~G-protein coupled purinergic nucleotide receptor activity	3	1.05263	0.0191721	P2RY10, P2RY6, GPR171	262	14	16881	13.8067	0.999808	0.292871	0.280971
Molecular function	GO:0004917~interleukin-7 receptor activity	2	0.701754	0.0306842	IL7R, IL2RG	262	2	16881	64.4313	0.999999	0.421499	0.404372
Molecular function	GO:0008301~DNA binding, bending	3	1.05263	0.0309574	TOP2A, LEF1, CRIP1	262	18	16881	10.7385	0.999999	0.421499	0.404372
Molecular function	GO:0019901~protein kinase binding	12	4.21053	0.0325768	TPX2, PTPRC, SYK, LCK, CD8A, ITGB2, KIF11, THY1, FOXM1, CD24, CD3E, JAK2	262	376	16881	2.05632	1	0.421499	0.404372
Molecular function	GO:0030246~carbohydrate binding	8	2.80702	0.0329441	FCN1, LGALS2, KLRK1, CD72, SELL, KLRB1, CLEC10A, LY75	262	196	16881	2.62985	1	0.421499	0.404372
Molecular function	GO:0005088~Ras guanyl-nucleotide exchange factor activity	6	2.10526	0.0331005	FGF9, CSF2RB, JAK2, IL2RG, GFRA2, RASGRP1	262	115	16881	3.36163	1	0.421499	0.404372
Molecular function	GO:0043621~protein self-association	4	1.40351	0.0340541	CCL5, CCDC88C, ADAM8, CTSC	262	46	16881	5.60272	1	0.421499	0.404372
Molecular function	GO:0043548~phosphatidylinositol 3-kinase binding	3	1.05263	0.0342527	LCK, JAK2, CORO1A	262	19	16881	10.1734	1	0.421499	0.404372
Molecular function	GO:0008237~metallopeptidase activity	5	1.75439	0.0368276	ADAM28, MMP3, ADAM8, LTA4H, MMP9	262	81	16881	3.97724	1	0.440936	0.42302
Molecular function	GO:0004298~threonine-type endopeptidase activity	3	1.05263	0.0412275	PSMB8, PSMB10, PSMB9	262	21	16881	9.20447	1	0.47926	0.459787
Molecular function	GO:0031735~CCR10 chemokine receptor binding	2	0.701754	0.0456727	CCL19, CXCL13	262	3	16881	42.9542	1	0.47926	0.459787
Molecular function	GO:0030369~ICAM-3 receptor activity	2	0.701754	0.0456727	ITGB2, ITGAL	262	3	16881	42.9542	1	0.47926	0.459787
Molecular function	GO:0004833~tryptophan 2,3-dioxygenase activity	2	0.701754	0.0456727	TDO2, IDO1	262	3	16881	42.9542	1	0.47926	0.459787
Molecular function	GO:0023029~MHC class Ib protein binding	2	0.701754	0.0456727	TAP1, LILRB2	262	3	16881	42.9542	1	0.47926	0.459787
Molecular function	GO:0043027~cysteine-type endopeptidase inhibitor activity involved in apoptotic process	3	1.05263	0.0486833	LEF1, CD27, BIRC3	262	23	16881	8.40408	1	0.47926	0.459787
Molecular function	GO:0031210~phosphatidylcholine binding	3	1.05263	0.0486833	IGHM, RASGRP1, JCHAIN	262	23	16881	8.40408	1	0.47926	0.459787
Molecular function	GO:0048020~CCR chemokine receptor binding	3	1.05263	0.0486833	CCL13, CCL19, CCL18	262	23	16881	8.40408	1	0.47926	0.459787
Molecular function	GO:0004175~endopeptidase activity	4	1.40351	0.0509107	FAP, MMP1, MMP3, MMP9	262	54	16881	4.77269	1	0.490293	0.470371
Molecular function	GO:0005070~SH3/SH2 adaptor activity	4	1.40351	0.0556507	CHN1, SH2D1A, BLNK, ARHGAP4	262	56	16881	4.60224	1	0.524537	0.503224
Molecular function	GO:0046982~protein heterodimerization activity	13	4.5614	0.0578407	BARD1, TOP2A, TPD52, BCL2A1, TENM4, ITGB2, CYBB, CD3G, CYBA, ITGAL, CXCL13, CD3E, CD3D	262	465	16881	1.80131	1	0.525588	0.504232
Molecular function	GO:0019958~C-X-C chemokine binding	2	0.701754	0.0604304	CXCR3, CXCR6	262	4	16881	32.2156	1	0.525588	0.504232
Molecular function	GO:0047844~deoxycytidine deaminase activity	2	0.701754	0.0604304	APOBEC3G, APOBEC3B	262	4	16881	32.2156	1	0.525588	0.504232
Molecular function	GO:0001968~fibronectin binding	3	1.05263	0.060691	LRRC15, ITGA4, CTSS	262	26	16881	7.43438	1	0.525588	0.504232
Molecular function	GO:0020037~heme binding	6	2.10526	0.0616943	CYP27A1, TDO2, CYBB, CYBA, JAK2, IDO1	262	137	16881	2.82181	1	0.525588	0.504232
Molecular function	GO:0004435~phosphatidylinositol phospholipase C activity	3	1.05263	0.0648964	CCL5, PLCG2, CCR5	262	27	16881	7.15903	1	0.539258	0.517347
Molecular function	GO:0005518~collagen binding	4	1.40351	0.0657335	LRRC15, NID2, MMP9, CTSS	262	60	16881	4.29542	1	0.539258	0.517347
Molecular function	GO:0046934~phosphatidylinositol-4,5-bisphosphate 3-kinase activity	4	1.40351	0.0710671	CD86, FGF9, LCK, CD19	262	62	16881	4.15686	1	0.572413	0.549155
Molecular function	GO:0042169~SH2 domain binding	3	1.05263	0.0735871	SIT1, LCK, JAK2	262	29	16881	6.66531	1	0.572544	0.549281
Molecular function	GO:0019960~C-X3-C chemokine binding	2	0.701754	0.0749607	CX3CR1, ITGA4	262	5	16881	25.7725	1	0.572544	0.549281
Molecular function	GO:0016641~oxidoreductase activity, acting on the CH-NH2 group of donors, oxygen as acceptor	2	0.701754	0.0749607	LOXL1, LOXL2	262	5	16881	25.7725	1	0.572544	0.549281
Molecular function	GO:0001948~glycoprotein binding	4	1.40351	0.0794186	SERPINA1, LCK, ITGB2, SDC1	262	65	16881	3.965	1	0.596312	0.572083
Molecular function	GO:0003828~alpha-N-acetylneuraminate alpha-2,8-sialyltransferase activity	2	0.701754	0.0892671	ST8SIA1, ST8SIA4	262	6	16881	21.4771	1	0.659089	0.632308
Molecular function	GO:0003712~transcription cofactor activity	4	1.40351	0.0973186	MSX2, POU2AF1, LPXN, NMI	262	71	16881	3.62993	1	0.706756	0.678039
Down-regulagted genes
Biological process	GO:0048146~positive regulation of fibroblast proliferation	7	0.0244362	4.38987e-06	JUN, CDKN1A, MYC, EGFR, FOSL2, DDR2, EREG	170	36	13824	15.8118	0.00606154	0.00460168	0.00450859
Biological process	GO:0045600~positive regulation of fat cell differentiation	7	0.0244362	7.13345e-06	SFRP1, ZFP36, WIF1, ZBTB16, LMO3, ADIRF, PPARG	170	39	13824	14.5955	0.00983122	0.00460168	0.00450859
Biological process	GO:0042593~glucose homeostasis	9	0.031418	9.97475e-06	RBP4, IL6, IGFBP5, LEP, ADIPOQ, CRY2, PDK4, PPARG, FOXO3	170	86	13824	8.50999	0.0137201	0.00460168	0.00450859
Biological process	GO:0008217~regulation of blood pressure	6	0.0209453	5.3743e-05	RAMP2, EDNRB, NPY1R, PPARG, ATP1A2, PTGS2	170	34	13824	14.3502	0.0717331	0.0133094	0.0130402
Biological process	GO:0000122~negative regulation of transcription from RNA polymerase II promoter	17	0.0593451	5.73735e-05	FOXC2, EGR1, JUN, BMP4, NR4A2, PER1, ZFP36, NR4A3, EDNRB, BCL6, NFIL3, LEP, NFIC, PPARG, HES1, JUNB, ATF3	170	420	13824	3.29143	0.0763893	0.0133094	0.0130402
Biological process	GO:0048662~negative regulation of smooth muscle cell proliferation	5	0.0174544	5.76998e-05	IGFBP5, ADIPOQ, PPARG, APOD, NDRG2	170	18	13824	22.5882	0.0768066	0.0133094	0.0130402
Biological process	GO:0050679~positive regulation of epithelial cell proliferation	6	0.0209453	7.13898e-05	BMP4, SFRP1, IL6, NR4A3, MYC, EGFR	170	36	13824	13.5529	0.0941471	0.0141148	0.0138292
Biological process	GO:0045944~positive regulation of transcription from RNA polymerase II promoter	20	0.0698178	8.77522e-05	EGR1, JUN, LIF, ADIRF, FOS, NPAS2, EGFR, VEGFA, FSTL3, FOSL2, NR4A2, NR4A1, PER1, IL6, NFIC, MYC, MAFF, PPARG, HES1, JUNB	170	580	13824	2.80406	0.114446	0.0150711	0.0147662
Biological process	GO:0048661~positive regulation of smooth muscle cell proliferation	5	0.0174544	0.000109668	BMP4, IL6, NR4A3, ELANE, HBEGF	170	21	13824	19.3613	0.140924	0.0150711	0.0147662
Biological process	GO:0006094~gluconeogenesis	5	0.0174544	0.000109668	RBP4, PC, GPD1, PCK1, ATF3	170	21	13824	19.3613	0.140924	0.0150711	0.0147662
Biological process	GO:0070373~negative regulation of ERK1 and ERK2 cascade	6	0.0209453	0.000119785	LMO3, ADIPOQ, LIF, SPRY2, NDRG2, ATF3	170	40	13824	12.1976	0.152879	0.0150711	0.0147662
Biological process	GO:0042493~response to drug	7	0.0244362	0.00019368	SFRP1, EMX2, JUN, MYC, APOD, FOS, JUNB	170	69	13824	8.24962	0.2353	0.0223377	0.0218858
Biological process	GO:0043066~negative regulation of apoptotic process	12	0.0418907	0.000221012	BTC, BMP4, SOCS3, IL6, WNT11, BCL6, MYC, SPRY2, CRYAB, EGFR, VEGFA, IER3	170	246	13824	3.96671	0.263713	0.0224089	0.0219555
Biological process	GO:0043065~positive regulation of apoptotic process	9	0.031418	0.000226679	BMP4, NR4A1, IL6, WNT11, BCL6, GADD45B, GADD45A, ZBTB16, RHOB	170	133	13824	5.5027	0.269471	0.0224089	0.0219555
Biological process	GO:0010629~negative regulation of gene expression	7	0.0244362	0.000264191	CDKN1A, PC, FABP4, TIPARP, CRYAB, LDLR, ACACB	170	73	13824	7.79758	0.306465	0.024376	0.0238829
Biological process	GO:0071376~cellular response to corticotropin-releasing hormone stimulus	3	0.0104727	0.000442149	NR4A2, NR4A1, NR4A3	170	3	13824	81.3176	0.458012	0.0381907	0.0374181
Biological process	GO:0030224~monocyte differentiation	4	0.0139636	0.000469106	BMP4, JUN, PPARG, VEGFA	170	13	13824	25.0208	0.477883	0.0381907	0.0374181
Biological process	GO:0051897~positive regulation of protein kinase B signaling	6	0.0209453	0.000756041	MYOC, IGFBP5, LEP, SPRY2, EGFR, HBEGF	170	59	13824	8.26959	0.649191	0.0559487	0.0548168
Biological process	GO:0001649~osteoblast differentiation	7	0.0244362	0.000768082	BMP4, SFRP1, WNT11, MYOC, IGFBP5, FASN, JUNB	170	89	13824	6.39577	0.654997	0.0559487	0.0548168
Biological process	GO:0097084~vascular smooth muscle cell development	3	0.0104727	0.000877183	RAMP2, HES1, ADM	170	4	13824	60.9882	0.703418	0.058924	0.0577319
Biological process	GO:0019433~triglyceride catabolic process	4	0.0139636	0.000894079	LIPE, LPL, APOB, PNPLA2	170	16	13824	20.3294	0.710284	0.058924	0.0577319
Biological process	GO:0032869~cellular response to insulin stimulus	5	0.0174544	0.00103931	ADIPOQ, ENPP1, INHBB, MYH11, PPARG	170	37	13824	10.9889	0.763119	0.0647446	0.0634347
Biological process	GO:0010906~regulation of glucose metabolic process	4	0.0139636	0.00107596	IGFBP5, ADIPOQ, PDK4, ACACB	170	17	13824	19.1336	0.774854	0.0647446	0.0634347
Biological process	GO:0006006~glucose metabolic process	5	0.0174544	0.00115062	IGFBP5, LEP, ADIPOQ, NPY1R, APOD	170	38	13824	10.6997	0.796995	0.0663524	0.06501
Biological process	GO:0045892~negative regulation of transcription, DNA-templated	11	0.0383998	0.00120948	BMP4, SFRP1, WNT11, FABP4, BCL6, ADIPOQ, CRY2, SIX3, HES1, PPARG, EREG	170	256	13824	3.49412	0.812905	0.0669566	0.065602
Biological process	GO:0043401~steroid hormone mediated signaling pathway	4	0.0139636	0.00127961	BMP4, NR4A2, NR4A1, PPARG	170	18	13824	18.0706	0.830244	0.0681146	0.0667366
Biological process	GO:0044320~cellular response to leptin stimulus	3	0.0104727	0.00145022	NR4A3, LEP, INHBB	170	5	13824	48.7906	0.866013	0.0743371	0.0728332
Biological process	GO:0010628~positive regulation of gene expression	8	0.0279271	0.00179998	NTRK2, RAMP2, WNT11, FABP4, NFIL3, SPRY2, APOB, LDLR	170	142	13824	4.58128	0.917522	0.0889705	0.0871705
Biological process	GO:0042517~positive regulation of tyrosine phosphorylation of Stat3 protein	4	0.0139636	0.00203028	IL6, LIF, HES1, CRLF1	170	21	13824	15.4891	0.940083	0.0940066	0.0921047
Biological process	GO:0032270~positive regulation of cellular protein metabolic process	3	0.0104727	0.00215786	ADIPOQ, AGTR1, KLF4	170	6	13824	40.6588	0.949806	0.0940066	0.0921047
Biological process	GO:0034383~low-density lipoprotein particle clearance	3	0.0104727	0.00215786	ADIPOQ, APOB, LDLR	170	6	13824	40.6588	0.949806	0.0940066	0.0921047
Biological process	GO:0035914~skeletal muscle cell differentiation	5	0.0174544	0.00217356	EGR1, NR4A1, MAFF, FOS, ATF3	170	45	13824	9.03529	0.950888	0.0940066	0.0921047
Biological process	GO:0060326~cell chemotaxis	5	0.0174544	0.00255329	CCL25, AGTR1, CXCL2, HBEGF	170	47	13824	8.65081	0.971011	0.107083	0.104917
Biological process	GO:0001570~vasculogenesis	5	0.0174544	0.00275921	NTRK2, RAMP2, TIPARP, ADM, JUNB	170	48	13824	8.47059	0.978221	0.112316	0.110044
Biological process	GO:0009749~response to glucose	4	0.0139636	0.00379533	EGR1, ADIPOQ, LPL, IRS2	170	26	13824	12.5104	0.994839	0.14436	0.14144
Biological process	GO:0045766~positive regulation of angiogenesis	6	0.0209453	0.00384179	RAMP2, C6, VEGFD, ADM, VEGFA, RHOB	170	85	13824	5.74007	0.995161	0.14436	0.14144
Biological process	GO:0010941~regulation of cell death	3	0.0104727	0.00396365	JUN, JUNB, IER3	170	8	13824	30.4941	0.995916	0.14436	0.14144
Biological process	GO:0031953~negative regulation of protein autophosphorylation	3	0.0104727	0.00396365	JUN, ADIPOQ, ENPP1	170	8	13824	30.4941	0.995916	0.14436	0.14144
Biological process	GO:0008284~positive regulation of cell proliferation	10	0.0349089	0.00438796	BTC, FABP4, MYC, LIF, ADM, AREG, CRLF1, VEGFA, EREG, HBEGF	170	257	13824	3.16411	0.997736	0.155716	0.152566
Biological process	GO:0006955~immune response	9	0.031418	0.00489282	TGFBR3, CCL25, C6, NFIL3, C7, LIF, ENPP1, CXCL2	170	215	13824	3.40399	0.998879	0.164728	0.161395
Biological process	GO:0032868~response to insulin	4	0.0139636	0.00519296	EGR1, LEP, CRY2, PCK1	170	29	13824	11.2162	0.999262	0.164728	0.161395
Biological process	GO:0008285~negative regulation of cell proliferation	9	0.031418	0.00521226	JUN, CDKN1A, BCL6, ZBTB16, LIF, SPRY2, KLF4, TNS2, EREG	170	217	13824	3.37262	0.999281	0.164728	0.161395
Biological process	GO:0033138~positive regulation of peptidyl-serine phosphorylation	5	0.0174544	0.00547507	PPP1R15A, NTRK2, IL6, SPRY2, VEGFA	170	58	13824	7.01014	0.999501	0.164728	0.161395
Biological process	GO:0060395~SMAD protein signal transduction	5	0.0174544	0.00547507	BMP4, JUN, GDF15, INHBB, FOS	170	58	13824	7.01014	0.999501	0.164728	0.161395
Biological process	GO:0071356~cellular response to tumor necrosis factor	5	0.0174544	0.00547507	CCL25, SFRP1, ZFP36, IL6, GPD1	170	58	13824	7.01014	0.999501	0.164728	0.161395
Biological process	GO:0045444~fat cell differentiation	5	0.0174544	0.00547507	NR4A2, NR4A1, NR4A3, INHBB, KLF4	170	58	13824	7.01014	0.999501	0.164728	0.161395
Biological process	GO:0071277~cellular response to calcium ion	4	0.0139636	0.00571875	JUN, FOSB, FOS, JUNB	170	30	13824	10.8424	0.999645	0.168399	0.164992
Biological process	GO:0007173~epidermal growth factor receptor signaling pathway	4	0.0139636	0.00627531	BTC, AREG, EREG, HBEGF	170	31	13824	10.4926	0.999836	0.177245	0.17366
Biological process	GO:0006633~fatty acid biosynthetic process	4	0.0139636	0.00627531	SCD, FASN, LPL, ACACB	170	31	13824	10.4926	0.999836	0.177245	0.17366
Biological process	GO:0003151~outflow tract morphogenesis	4	0.0139636	0.00686309	BMP4, JUN, WNT11, NPY1R	170	32	13824	10.1647	0.999928	0.18997	0.186127
Biological process	GO:1900745~positive regulation of p38MAPK cascade	3	0.0104727	0.00760036	GADD45B, GADD45A, LEP	170	11	13824	22.1775	0.999974	0.19847	0.194455
Biological process	GO:0051591~response to cAMP	3	0.0104727	0.00760036	PER1, JUN, JUNB	170	11	13824	22.1775	0.999974	0.19847	0.194455
Biological process	GO:0001953~negative regulation of cell-matrix adhesion	3	0.0104727	0.00760036	BCL6, MYOC, SEMA3E	170	11	13824	22.1775	0.999974	0.19847	0.194455
Biological process	GO:0008203~cholesterol metabolic process	4	0.0139636	0.00813397	LIPE, LEP, APOB, LDLR	170	34	13824	9.56678	0.999988	0.208471	0.204253
Biological process	GO:0046697~decidualization	3	0.0104727	0.00904761	LIF, PTGS2, JUNB	170	12	13824	20.3294	0.999997	0.219682	0.215238
Biological process	GO:0048844~artery morphogenesis	3	0.0104727	0.00904761	FOXC2, WNT11, APOB	170	12	13824	20.3294	0.999997	0.219682	0.215238
Biological process	GO:0009612~response to mechanical stimulus	3	0.0104727	0.00904761	JUN, INHBB, JUNB	170	12	13824	20.3294	0.999997	0.219682	0.215238
Biological process	GO:0051726~regulation of cell cycle	5	0.0174544	0.00956758	JUN, GADD45B, GADD45A, LEP, JUNB	170	68	13824	5.97924	0.999998	0.224433	0.219892
Biological process	GO:0060070~canonical Wnt signaling pathway	5	0.0174544	0.00956758	SFRP1, WNT11, MYC, PLPP3, KLF4	170	68	13824	5.97924	0.999998	0.224433	0.219892
Biological process	GO:0001666~response to hypoxia	5	0.0174544	0.0122025	NR4A2, EGR1, VEGFD, CRYAB, VEGFA	170	73	13824	5.5697	1	0.274046	0.268501
Biological process	GO:0071542~dopaminergic neuron differentiation	3	0.0104727	0.0122766	NR4A2, SFRP1, VEGFD	170	14	13824	17.4252	1	0.274046	0.268501
Biological process	GO:0048010~vascular endothelial growth factor receptor signaling pathway	3	0.0104727	0.0122766	FOXC2, VEGFD, VEGFA	170	14	13824	17.4252	1	0.274046	0.268501
Biological process	GO:0007219~Notch signaling pathway	5	0.0174544	0.0127798	FOXC2, PLN, HP, HES1, TIMP4	170	74	13824	5.49444	1	0.280749	0.275069
Biological process	GO:0055114~oxidation-reduction process	10	0.0349089	0.0157243	AOC3, SCD, MAOA, GPX3, FASN, DIO3, FMO2, PTGS2, CDO1, AASS	170	316	13824	2.57334	1	0.334096	0.327337
Biological process	GO:0009314~response to radiation	3	0.0104727	0.0159323	JUN, MYC, JUNB	170	16	13824	15.2471	1	0.334096	0.327337
Biological process	GO:0051894~positive regulation of focal adhesion assembly	3	0.0104727	0.0159323	SFRP1, MYOC, VEGFA	170	16	13824	15.2471	1	0.334096	0.327337
Biological process	GO:0043408~regulation of MAPK cascade	4	0.0139636	0.0164753	BMP4, MYOC, GDF15, INHBB	170	44	13824	7.39251	1	0.340326	0.333441
Biological process	GO:0032496~response to lipopolysaccharide	5	0.0174544	0.0187665	SLPI, JUNB, CXCL2, ELANE	170	83	13824	4.89865	1	0.373912	0.366347
Biological process	GO:0030308~negative regulation of cell growth	5	0.0174544	0.0195223	SFRP1, CDKN1A, WNT11, BCL6, ENPP1	170	84	13824	4.84034	1	0.373912	0.366347
Biological process	GO:0042632~cholesterol homeostasis	4	0.0139636	0.0196439	FABP4, LPL, APOB, LDLR	170	47	13824	6.92065	1	0.373912	0.366347
Biological process	GO:0071347~cellular response to interleukin-1	4	0.0139636	0.0196439	CCL25, SFRP1, IL6, PTGS2	170	47	13824	6.92065	1	0.373912	0.366347
Biological process	GO:0007015~actin filament organization	4	0.0139636	0.0196439	TMOD1, LMOD1, WASL, RND1	170	47	13824	6.92065	1	0.373912	0.366347
Biological process	GO:0045597~positive regulation of cell differentiation	3	0.0104727	0.0199924	SOCS3, JUN, JUNB	170	18	13824	13.5529	1	0.373912	0.366347
Biological process	GO:0045429~positive regulation of nitric oxide biosynthetic process	3	0.0104727	0.0199924	PTX3, KLF4, EGFR	170	18	13824	13.5529	1	0.373912	0.366347
Biological process	GO:0001938~positive regulation of endothelial cell proliferation	4	0.0139636	0.0207696	BMP4, JUN, VEGFD, VEGFA	170	48	13824	6.77647	1	0.383268	0.375514
Biological process	GO:0006366~transcription from RNA polymerase II promoter	6	0.0209453	0.021059	NR4A2, NR4A1, NFIL3, MAFF, FOS, JUNB	170	129	13824	3.78222	1	0.383496	0.375737
Biological process	GO:0001822~kidney development	4	0.0139636	0.0231253	BMP4, TIPARP, AGTR1, TNS2	170	50	13824	6.50541	1	0.415654	0.407245
Biological process	GO:0001525~angiogenesis	6	0.0209453	0.0243471	RAMP2, JUN, LEP, VEGFD, VEGFA, RHOB	170	134	13824	3.64109	1	0.422729	0.414176
Biological process	GO:0045786~negative regulation of cell cycle	3	0.0104727	0.0244352	BMP4, NR4A1, RHOB	170	20	13824	12.1976	1	0.422729	0.414176
Biological process	GO:0021983~pituitary gland development	3	0.0104727	0.0244352	BMP4, SIX3, PITX1	170	20	13824	12.1976	1	0.422729	0.414176
Biological process	GO:0032526~response to retinoic acid	3	0.0104727	0.02924	RBP4, PPARG, KLF4	170	22	13824	11.0888	1	0.499606	0.489499
Biological process	GO:0045740~positive regulation of DNA replication	3	0.0104727	0.0317718	AREG, EGFR, EREG	170	23	13824	10.6066	1	0.511676	0.501324
Biological process	GO:0042127~regulation of cell proliferation	6	0.0209453	0.0334729	JUN, BCL6, PTGS2, JUNB, CXCL2	170	146	13824	3.34182	1	0.511676	0.501324
Biological process	GO:0043086~negative regulation of catalytic activity	3	0.0104727	0.0343867	PLN, ACACB, TIMP4	170	24	13824	10.1647	1	0.511676	0.501324
Biological process	GO:0035116~embryonic hindlimb morphogenesis	3	0.0104727	0.0343867	BMP4, ZBTB16, PITX1	170	24	13824	10.1647	1	0.511676	0.501324
Biological process	GO:0032387~negative regulation of intracellular transport	2	0.00698178	0.0362314	MAP1B, CRYAB	170	3	13824	54.2118	1	0.511676	0.501324
Biological process	GO:0060197~cloacal septation	2	0.00698178	0.0362314	BMP4, WNT11	170	3	13824	54.2118	1	0.511676	0.501324
Biological process	GO:0042758~long-chain fatty acid catabolic process	2	0.00698178	0.0362314	LIPE, ACADL	170	3	13824	54.2118	1	0.511676	0.501324
Biological process	GO:0071504~cellular response to heparin	2	0.00698178	0.0362314	EGR1, SFRP1	170	3	13824	54.2118	1	0.511676	0.501324
Biological process	GO:0051272~positive regulation of cellular component movement	2	0.00698178	0.0362314	BCL6, VEGFA	170	3	13824	54.2118	1	0.511676	0.501324
Biological process	GO:0050999~regulation of nitric-oxide synthase activity	2	0.00698178	0.0362314	LEP, EGFR	170	3	13824	54.2118	1	0.511676	0.501324
Biological process	GO:0045415~negative regulation of interleukin-8 biosynthetic process	2	0.00698178	0.0362314	KLF4, ELANE	170	3	13824	54.2118	1	0.511676	0.501324
Biological process	GO:0045079~negative regulation of chemokine biosynthetic process	2	0.00698178	0.0362314	IL6, ELANE	170	3	13824	54.2118	1	0.511676	0.501324
Biological process	GO:0042420~dopamine catabolic process	2	0.00698178	0.0362314	MAOA, SLC6A3	170	3	13824	54.2118	1	0.511676	0.501324
Biological process	GO:0001878~response to yeast	2	0.00698178	0.0362314	PTX3, ELANE	170	3	13824	54.2118	1	0.511676	0.501324
Biological process	GO:0060675~ureteric bud morphogenesis	2	0.00698178	0.0362314	WNT11, HES1	170	3	13824	54.2118	1	0.511676	0.501324
Biological process	GO:0061626~pharyngeal arch artery morphogenesis	2	0.00698178	0.0362314	BMP4, HES1	170	3	13824	54.2118	1	0.511676	0.501324
Biological process	GO:0010574~regulation of vascular endothelial growth factor production	2	0.00698178	0.0362314	IL6, NDRG2	170	3	13824	54.2118	1	0.511676	0.501324
Biological process	GO:0071479~cellular response to ionizing radiation	3	0.0104727	0.0370823	CDKN1A, GADD45A, RHOB	170	25	13824	9.75812	1	0.518403	0.507915
Biological process	GO:0019915~lipid storage	3	0.0104727	0.0398562	CRY2, PLIN2, PNPLA2	170	26	13824	9.38281	1	0.546149	0.5351
Biological process	GO:0050873~brown fat cell differentiation	3	0.0104727	0.0398562	FABP4, ADIPOQ, PTGS2	170	26	13824	9.38281	1	0.546149	0.5351
Biological process	GO:0030336~negative regulation of cell migration	4	0.0139636	0.0418065	SFRP1, WNT11, ADIPOQ, RHOB	170	63	13824	5.16303	1	0.567257	0.55578
Biological process	GO:0043407~negative regulation of MAP kinase activity	3	0.0104727	0.0427062	BMP4, ADIPOQ, SPRY2	170	27	13824	9.03529	1	0.573839	0.562229
Biological process	GO:0051091~positive regulation of sequence-specific DNA binding transcription factor activity	4	0.0139636	0.0451895	IL6, PPARG, PLPP3, DDR2	170	65	13824	5.00416	1	0.601368	0.589201
Biological process	GO:0007266~Rho protein signal transduction	3	0.0104727	0.0456299	BCL6, CDC42EP4, AGTR1	170	28	13824	8.71261	1	0.601446	0.589278
Biological process	GO:0060235~lens induction in camera-type eye	2	0.00698178	0.0480161	BMP4, SIX3	170	4	13824	40.6588	1	0.606283	0.594017
Biological process	GO:0060708~spongiotrophoblast differentiation	2	0.00698178	0.0480161	SOCS3, LIF	170	4	13824	40.6588	1	0.606283	0.594017
Biological process	GO:0042159~lipoprotein catabolic process	2	0.00698178	0.0480161	APOB, LDLR	170	4	13824	40.6588	1	0.606283	0.594017
Biological process	GO:0048286~lung alveolus development	3	0.0104727	0.0486253	BMP4, IGFBP5, LIF	170	29	13824	8.41217	1	0.606283	0.594017
Biological process	GO:0060548~negative regulation of cell death	3	0.0104727	0.0486253	BMP4, WNT11, NPAS2	170	29	13824	8.41217	1	0.606283	0.594017
Biological process	GO:0001657~ureteric bud development	3	0.0104727	0.0486253	FOXC2, SFRP1, CRLF1	170	29	13824	8.41217	1	0.606283	0.594017
Biological process	GO:0009791~post-embryonic development	4	0.0139636	0.0505106	BMP4, NR4A2, TIPARP, APOB	170	68	13824	4.78339	1	0.624167	0.61154
Biological process	GO:0010595~positive regulation of endothelial cell migration	3	0.0104727	0.05169	BMP4, VEGFA, RHOB	170	30	13824	8.13176	1	0.627535	0.614839
Biological process	GO:0007623~circadian rhythm	3	0.0104727	0.05169	NTRK2, NFIL3, KLF9	170	30	13824	8.13176	1	0.627535	0.614839
Biological process	GO:0006469~negative regulation of protein kinase activity	4	0.0139636	0.0542199	SOCS3, FABP4, GADD45B, GADD45A	170	70	13824	4.64672	1	0.652524	0.639323
Biological process	GO:0098869~cellular oxidant detoxification	3	0.0104727	0.0548221	GPX3, HP, PTGS2	170	31	13824	7.86945	1	0.654084	0.640851
Biological process	GO:0007399~nervous system development	4	0.0139636	0.0580562	MAP1B, FOS, NDRG2, APOB	170	72	13824	4.51765	1	0.660529	0.647166
Biological process	GO:0021984~adenohypophysis development	2	0.00698178	0.0596576	HES1, SLC6A3	170	5	13824	32.5271	1	0.660529	0.647166
Biological process	GO:0010881~regulation of cardiac muscle contraction by regulation of the release of sequestered calcium ion	2	0.00698178	0.0596576	PLN, CASQ2	170	5	13824	32.5271	1	0.660529	0.647166
Biological process	GO:0034115~negative regulation of heterotypic cell-cell adhesion	2	0.00698178	0.0596576	ADIPOQ, KLF4	170	5	13824	32.5271	1	0.660529	0.647166
Biological process	GO:0001823~mesonephros development	2	0.00698178	0.0596576	BMP4, ZBTB16	170	5	13824	32.5271	1	0.660529	0.647166
Biological process	GO:0010891~negative regulation of sequestering of triglyceride	2	0.00698178	0.0596576	PPARG, PNPLA2	170	5	13824	32.5271	1	0.660529	0.647166
Biological process	GO:1990441~negative regulation of transcription from RNA polymerase II promoter in response to endoplasmic reticulum stress	2	0.00698178	0.0596576	PPP1R15A, JUN	170	5	13824	32.5271	1	0.660529	0.647166
Biological process	GO:2000323~negative regulation of glucocorticoid receptor signaling pathway	2	0.00698178	0.0596576	PER1, CRY2	170	5	13824	32.5271	1	0.660529	0.647166
Biological process	GO:0060449~bud elongation involved in lung branching	2	0.00698178	0.0596576	BMP4, SPRY2	170	5	13824	32.5271	1	0.660529	0.647166
Biological process	GO:0051496~positive regulation of stress fiber assembly	3	0.0104727	0.0612798	SFRP1, WNT11, MYOC	170	33	13824	7.39251	1	0.673105	0.659487
Biological process	GO:0006351~transcription, DNA-templated	13	0.0453816	0.0663223	EGR1, JUN, CEBPD, LMO3, WASL, NPAS2, FSTL3, NR4A2, NFIC, MYC, PPARG, HES1, ATF3	170	603	13824	1.75312	1	0.716273	0.701782
Biological process	GO:0030335~positive regulation of cell migration	5	0.0174544	0.0703531	WNT11, MYOC, SEMA3E, IRS2, EGFR	170	127	13824	3.20148	1	0.716273	0.701782
Biological process	GO:0090037~positive regulation of protein kinase C signaling	2	0.00698178	0.0711576	WNT11, VEGFA	170	6	13824	27.1059	1	0.716273	0.701782
Biological process	GO:0060687~regulation of branching involved in prostate gland morphogenesis	2	0.00698178	0.0711576	BMP4, SFRP1	170	6	13824	27.1059	1	0.716273	0.701782
Biological process	GO:0010642~negative regulation of platelet-derived growth factor receptor signaling pathway	2	0.00698178	0.0711576	ADIPOQ, APOD	170	6	13824	27.1059	1	0.716273	0.701782
Biological process	GO:0060754~positive regulation of mast cell chemotaxis	2	0.00698178	0.0711576	VEGFD, VEGFA	170	6	13824	27.1059	1	0.716273	0.701782
Biological process	GO:0021978~telencephalon regionalization	2	0.00698178	0.0711576	BMP4, SIX3	170	6	13824	27.1059	1	0.716273	0.701782
Biological process	GO:0010886~positive regulation of cholesterol storage	2	0.00698178	0.0711576	LPL, APOB	170	6	13824	27.1059	1	0.716273	0.701782
Biological process	GO:0046888~negative regulation of hormone secretion	2	0.00698178	0.0711576	IL6, LIF	170	6	13824	27.1059	1	0.716273	0.701782
Biological process	GO:0090050~positive regulation of cell migration involved in sprouting angiogenesis	2	0.00698178	0.0711576	FOXC2, VEGFA	170	6	13824	27.1059	1	0.716273	0.701782
Biological process	GO:0030890~positive regulation of B cell proliferation	3	0.0104727	0.0714203	CDKN1A, BCL6, IRS2	170	36	13824	6.77647	1	0.716273	0.701782
Biological process	GO:0001558~regulation of cell growth	3	0.0104727	0.0714203	IGFBP5, FAM107A, IGFBP6	170	36	13824	6.77647	1	0.716273	0.701782
Biological process	GO:0070374~positive regulation of ERK1 and ERK2 cascade	5	0.0174544	0.0752398	BMP4, CCL25, JUN, SPRY2, EGFR	170	130	13824	3.1276	1	0.74915	0.733994
Biological process	GO:0008286~insulin receptor signaling pathway	3	0.0104727	0.0784609	FOXC2, PDK4, IRS2	170	38	13824	6.41981	1	0.766473	0.750967
Biological process	GO:0009267~cellular response to starvation	3	0.0104727	0.0820597	SFRP1, PDK4, INHBB	170	39	13824	6.2552	1	0.766473	0.750967
Biological process	GO:0050727~regulation of inflammatory response	3	0.0104727	0.0820597	IL1RL2, BCL6, IL1R1	170	39	13824	6.2552	1	0.766473	0.750967
Biological process	GO:0000185~activation of MAPKKK activity	2	0.00698178	0.0825177	GADD45B, GADD45A	170	7	13824	23.2336	1	0.766473	0.750967
Biological process	GO:2001214~positive regulation of vasculogenesis	2	0.00698178	0.0825177	RAMP2, ADM	170	7	13824	23.2336	1	0.766473	0.750967
Biological process	GO:0043116~negative regulation of vascular permeability	2	0.00698178	0.0825177	RAMP2, ADM	170	7	13824	23.2336	1	0.766473	0.750967
Biological process	GO:0014912~negative regulation of smooth muscle cell migration	2	0.00698178	0.0825177	IGFBP5, ADIPOQ	170	7	13824	23.2336	1	0.766473	0.750967
Biological process	GO:0006957~complement activation, alternative pathway	2	0.00698178	0.0825177	CFD, C7	170	7	13824	23.2336	1	0.766473	0.750967
Biological process	GO:0010745~negative regulation of macrophage derived foam cell differentiation	2	0.00698178	0.0825177	ADIPOQ, PPARG	170	7	13824	23.2336	1	0.766473	0.750967
Biological process	GO:0051694~pointed-end actin filament capping	2	0.00698178	0.0825177	TMOD1, LMOD1	170	7	13824	23.2336	1	0.766473	0.750967
Biological process	GO:0042102~positive regulation of T cell proliferation	3	0.0104727	0.0857085	IL6, LEP, HES1	170	40	13824	6.09882	1	0.790803	0.774804
Biological process	GO:0043567~regulation of insulin-like growth factor receptor signaling pathway	2	0.00698178	0.0937397	IGFBP5, IGFBP6	170	8	13824	20.3294	1	0.837005	0.820071
Biological process	GO:0010744~positive regulation of macrophage derived foam cell differentiation	2	0.00698178	0.0937397	LPL, APOB	170	8	13824	20.3294	1	0.837005	0.820071
Biological process	GO:0046325~negative regulation of glucose import	2	0.00698178	0.0937397	LEP, ENPP1	170	8	13824	20.3294	1	0.837005	0.820071
Biological process	GO:0042053~regulation of dopamine metabolic process	2	0.00698178	0.0937397	NR4A2, SLC6A3	170	8	13824	20.3294	1	0.837005	0.820071
Biological process	GO:0051639~actin filament network formation	2	0.00698178	0.0937397	COBL, PLS1	170	8	13824	20.3294	1	0.837005	0.820071
Biological process	GO:0010862~positive regulation of pathway-restricted SMAD protein phosphorylation	3	0.0104727	0.0969372	BMP4, GDF15, INHBB	170	43	13824	5.67332	1	0.85453	0.837241
Biological process	GO:0008344~adult locomotory behavior	3	0.0104727	0.0969372	TMOD1, NR4A2, ATP1A2	170	43	13824	5.67332	1	0.85453	0.837241
Cellular component	GO:0005615~extracellular space	41	0.143126	1.79168e-13	SERPINA3, HP, LTBP4, LPL, ADM, SEMA3E, CXCL2, AREG, SERPINA5, FSTL3, WNT11, ENPP1, APOD, IGFBP6, ELANE, TIMP4, AOC3, CCL25, IGFBP5, MYOC, GDF15, GPX3, ADIPOQ, LIF, VEGFD, INHBB, EREG, VEGFA, BTC, TGFBR3, BMP4, SFRP1, IL6, RBP4, SLPI, LEP, PTX3, CES1, HBEGF	174	950	15461	3.83485	2.95663e-11	2.95627e-11	2.92043e-11
Cellular component	GO:0009986~cell surface	16	0.0558542	4.95049e-06	AOC3, RAMP2, SDC4, IL1R1, ADIPOQ, LPL, AREG, SLC6A3, EGFR, VEGFA, SFRP1, ADGRG2, ENPP1, LDLR, ELANE, HBEGF	174	332	15461	4.28223	0.000816499	0.000408415	0.000403465
Cellular component	GO:0070062~extracellular exosome	40	0.139636	0.00148083	SDC4, LAMA2, RHOBTB3, LTBP4, LPL, ADIRF, WASL, NDRG2, FBLN2, SERPINA5, ADGRG2, C6, C7, MYH11, APOD, IGFBP6, PCK1, APOB, WASF3, ELANE, PLS1, MYOC, GDF15, GPX3, ADIPOQ, FAH, MPP6, RHOB, TGFBR3, SFRP1, RBP4, FABP4, GPRC5A, SLPI, FASN, GPD1, PLPP3, CRYAB, FKBP5, DDR2	174	2162	15461	1.64397	0.216918	0.0814456	0.0804584
Cellular component	GO:0005829~cytosol	22	0.0767996	0.00525585	NTRK2, GABARAPL1, CDKN1A, RHOBTB3, IRS2, WASL, FOS, FOXO3, LIPE, ZFP36, SFRP1, FABP4, MAP1B, GPD1, PDE4B, SPRY2, PLIN2, PLIN1, PCK1, CDO1, CRYAB, PNPLA2	174	1025	15461	1.90716	0.58084	0.216804	0.214176
Cellular component	GO:0005667~transcription factor complex	7	0.0244362	0.00926057	NR4A1, JUN, NR4A3, FOS, JUNB, PITX1, NPAS2	174	160	15461	3.88746	0.784569	0.305599	0.301895
Cellular component	GO:0005811~lipid particle	4	0.0139636	0.0174104	LIPE, PLIN2, PLIN1, PNPLA2	174	49	15461	7.25358	0.944867	0.433147	0.427897
Cellular component	GO:0043235~receptor complex	5	0.0174544	0.0183759	TGFBR3, NTRK2, RAMP2, LDLR, EGFR	174	90	15461	4.93646	0.953123	0.433147	0.427897
Cellular component	GO:0005576~extracellular region	12	0.0418907	0.0267866	BMP4, CFD, CCL25, RBP4, CLUL1, C6, C7, ANGPTL7, PENK, PTX3, INHBB, TIMP4	174	505	15461	2.11144	0.988667	0.536072	0.529574
Cellular component	GO:0071944~cell periphery	3	0.0104727	0.0292403	ADIPOQ, PDE4B, INHBB	174	24	15461	11.107	0.992528	0.536072	0.529574
Cellular component	GO:0005634~nucleus	43	0.150108	0.0361529	FOXC2, DYRK3, CEBPD, HSPB6, FAM107A, ADIRF, WASL, FOXO3, ACACB, AREG, NPAS2, EGFR, LIPE, ZFP36, NFIL3, MYC, SIX3, HES1, IER3, EGR1, EMX2, GADD45B, TIPARP, GADD45A, FOS, PNRC1, FOSL2, RHOB, NR4A2, NR4A1, PER1, FABP4, NR4A3, BCL6, NFIC, CRY2, MAFF, SPRY2, FOSB, PPARG, PLIN2, CRYAB, ATF3	174	2873	15461	1.32991	0.997702	0.596523	0.589293
Cellular component	GO:0005578~proteinaceous extracellular matrix	6	0.0209453	0.0508261	BMP4, SFRP1, WNT11, MYOC, LTBP4, TIMP4	174	179	15461	2.97842	0.999817	0.752346	0.743226
Cellular component	GO:0005579~membrane attack complex	2	0.00698178	0.054716	C6, C7	174	5	15461	35.5425	0.999907	0.752346	0.743226
Cellular component	GO:0034362~low-density lipoprotein particle	2	0.00698178	0.0757595	APOB, LDLR	174	7	15461	25.3875	0.999998	0.961563	0.949908
Cellular component	GO:0005865~striated muscle thin filament	2	0.00698178	0.086106	TMOD1, LMOD1	174	8	15461	22.2141	1	0.992105	0.980079
Molecular function	GO:0017053~transcriptional repressor complex	3	0.0104727	0.0901913	JUN, ZBTB16, ELANE	174	45	15461	5.92375	1	0.992105	0.980079
Molecular function	GO:0008083~growth factor activity	12	0.0418907	1.16474e-09	BTC, BMP4, IL6, LIF, INHBB, VEGFD, CXCL2, AREG, VEGFA, EREG, HBEGF	163	72	13095	13.3896	3.42435e-07	3.43599e-07	3.37776e-07
Molecular function	GO:0001077~transcriptional activator activity, RNA polymerase II core promoter proximal region sequence-specific binding	12	0.0418907	2.0627e-05	NR4A2, EGR1, FOXC2, NR4A1, NR4A3, NFIC, ZIC1, FOSB, FOS, KLF4, JUNB, PITX1	163	187	13095	5.15534	0.00604606	0.00304249	0.00299092
Molecular function	GO:0000982~transcription factor activity, RNA polymerase II core promoter proximal region sequence-specific binding	5	0.0174544	0.000114622	JUN, FOSB, FOS, ATF3, FOSL2	163	21	13095	19.128	0.0331391	0.0112711	0.0110801
Molecular function	GO:0005154~epidermal growth factor receptor binding	4	0.0139636	0.000209244	BTC, AREG, EREG, HBEGF	163	10	13095	32.135	0.0596699	0.0154318	0.0151702
Molecular function	GO:0008201~heparin binding	8	0.0279271	0.000340349	BMP4, SFRP1, LPL, APOB, ELANE, VEGFA, SERPINA5, HBEGF	163	106	13095	6.0632	0.0952345	0.0200806	0.0197402
Molecular function	GO:0001968~fibronectin binding	3	0.0104727	0.00148428	IGFBP5, VEGFA, FSTL3	163	5	13095	48.2025	0.353836	0.0729771	0.0717402
Molecular function	GO:0000978~RNA polymerase II core promoter proximal region sequence-specific DNA binding	11	0.0383998	0.00211291	PER1, JUN, NR4A3, NFIC, ZIC1, FOSB, FOS, JUNB, PITX1, ATF3, FOSL2	163	273	13095	3.23704	0.463052	0.0890443	0.087535
Molecular function	GO:0004879~RNA polymerase II transcription factor activity, ligand-activated sequence-specific DNA binding	4	0.0139636	0.00310793	NR4A2, NR4A1, NR4A3, PPARG	163	24	13095	13.3896	0.599546	0.114605	0.112663
Molecular function	GO:0005125~cytokine activity	7	0.0244362	0.00512971	BMP4, IL6, GDF15, LIF, INHBB, VEGFA	163	128	13095	4.39345	0.779535	0.16814	0.165291
Molecular function	GO:0042803~protein homodimerization activity	9	0.031418	0.00691108	NR4A1, HSPB6, ADIPOQ, GPD1, HES1, INHBB, CRYAB, ATF3, VEGFA	163	225	13095	3.2135	0.86983	0.203877	0.200421
Molecular function	GO:0004806~triglyceride lipase activity	3	0.0104727	0.0143694	LIPE, LPL, PNPLA2	163	15	13095	16.0675	0.985811	0.385362	0.378831
Molecular function	GO:0003707~steroid hormone receptor activity	4	0.0139636	0.0238341	NR4A2, NR4A1, NR4A3, PPARG	163	50	13095	6.42699	0.999168	0.52888	0.519916
Molecular function	GO:0004909~interleukin-1, Type I, activating receptor activity	2	0.00698178	0.0245902	IL1RL2, IL1R1	163	2	13095	80.3374	0.999338	0.52888	0.519916
Molecular function	GO:0031490~chromatin DNA binding	4	0.0139636	0.0250994	FOXC2, PER1, BCL6, FOXO3	163	51	13095	6.30097	0.999432	0.52888	0.519916
Molecular function	GO:0042056~chemoattractant activity	3	0.0104727	0.0324649	BMP4, VEGFD, VEGFA	163	23	13095	10.4788	0.999939	0.616484	0.606035
Molecular function	GO:0005179~hormone activity	4	0.0139636	0.0334364	LEP, ADIPOQ, INHBB, ADM	163	57	13095	5.63771	0.999955	0.616484	0.606035
Molecular function	GO:0046982~protein heterodimerization activity	5	0.0174544	0.0488878	NR4A2, NR4A1, AGTR1, FOS, ATF3	163	111	13095	3.6188	1	0.827074	0.813055
Molecular function	GO:0005160~transforming growth factor beta receptor binding	3	0.0104727	0.0559782	BMP4, GDF15, INHBB	163	31	13095	7.77459	1	0.827074	0.813055
Molecular function	GO:0008144~drug binding	3	0.0104727	0.0592377	SFRP1, PPARG, ATP1A2	163	32	13095	7.53163	1	0.827074	0.813055
Molecular function	GO:0004075~biotin carboxylase activity	2	0.00698178	0.060353	PC, ACACB	163	5	13095	32.135	1	0.827074	0.813055
Molecular function	GO:0008131~primary amine oxidase activity	2	0.00698178	0.060353	AOC3, MAOA	163	5	13095	32.135	1	0.827074	0.813055
Molecular function	GO:0043565~sequence-specific DNA binding	9	0.031418	0.0693159	EGR1, FOXC2, NR4A1, EMX2, BCL6, CEBPD, MAFF, HES1, FOXO3	163	350	13095	2.06582	1	0.827074	0.813055
Molecular function	GO:0031995~insulin-like growth factor II binding	2	0.00698178	0.071982	IGFBP5, IGFBP6	163	6	13095	26.7791	1	0.827074	0.813055
Molecular function	GO:0031994~insulin-like growth factor I binding	2	0.00698178	0.071982	IGFBP5, IGFBP6	163	6	13095	26.7791	1	0.827074	0.813055
Molecular function	GO:0005161~platelet-derived growth factor receptor binding	2	0.00698178	0.071982	VEGFD, VEGFA	163	6	13095	26.7791	1	0.827074	0.813055
Molecular function	GO:0008009~chemokine activity	3	0.0104727	0.0728946	CCL25, CXCL2	163	36	13095	6.69479	1	0.827074	0.813055
